1 **Full Title: Chromatin landscape dynamics in development of the**  
2 **plant parasitic nematode *Meloidogyne incognita***

3  
4 **Short Title: Epigenomics of plant-parasitic nematodes**

5  
6 **Author list: Rahim Hassanaly-Goulamhousen<sup>1</sup>; Ronaldo De Carvalho Augusto<sup>2,3</sup>;**  
7 **Nathalie Marteu-Garello<sup>1</sup>; Arthur Péré<sup>1</sup>; Bruno Favery<sup>1</sup>, Martine Da Rocha<sup>1</sup>; Etienne**  
8 **G.J. Danchin<sup>1</sup>; Pierre Abad<sup>1</sup>; Christoph Grunau<sup>2\*</sup>; Laetitia Perfus-Barbeoch<sup>1\*</sup>.**

9 **Affiliations**

10 <sup>1</sup>Université Côte d'Azur, INRAE, CNRS, Institut Sophia Agrobiotech UMR 1355,  
11 France.

12 <sup>2</sup>IHPE, Univ Montpellier, CNRS, IFREMER, Univ Perpignan Via Domitia, Perpignan,  
13 France

14 <sup>3</sup>Laboratory of Biology and Modeling of the Cell, Ecole Normale Supérieure de Lyon,  
15 CNRS, Université Claude Bernard de Lyon, Université de Lyon, Lyon, France

16 **Corresponding Authors**

17 \*Perfus-Barbeoch L.: [laetitia.zurletto@univ-cotedazur.fr](mailto:laetitia.zurletto@univ-cotedazur.fr)

18 \*Grunau C.: [christoph.grunau@univ-perp.fr](mailto:christoph.grunau@univ-perp.fr)

19

20 **Author contributions**

21 Conceptualization: Rahim Hassanaly-Goulamhousen, Christoph Grunau, Pierre  
22 Abad, Laetitia Perfus-Barbeoch.

23 Data curation: Rahim Hassanaly-Goulamhousen, Christoph Grunau.

24 Formal analysis: Rahim Hassanaly-Goulamhousen, Christoph Grunau, Ronaldo De  
25 Carvalho Augusto, Arthur Péré, Bruno Favery, Martine Da Rocha; Etienne G.J.  
26 Danchin.

27 Funding acquisition: Pierre Abad, Laetitia Perfus-Barbeoch.

28 Investigation: Rahim Hassanaly-Goulamhousen, Christoph Grunau, Pierre Abad,  
29 Laetitia Perfus-Barbeoch.

30 Methodology: Rahim Hassanaly-Goulamhousen, Christoph Grunau, Laetitia Perfus-  
31 Barbeoch.

32 Project administration: Pierre Abad.

33 Resources: Rahim Hassanaly-Goulamhousen, Christoph Grunau, Nathalie Marteu-  
34 Garello.

35 Supervision: Christoph Grunau, Pierre Abad, Laetitia Perfus-Barbeoch.

36 Validation: Rahim Hassanaly-Goulamhousen, Christoph Grunau.

37 Visualization: Rahim Hassanaly-Goulamhousen, Pierre Abad, Laetitia Perfus-  
38 Barbeoch.

39 Writing– original draft preparation: Rahim Hassanaly-Goulamhousen.

40 Writing– review & editing: Rahim Hassanaly-Goulamhousen, Etienne G.J. Danchin,  
41 Bruno Favery, Pierre Abad, Christoph Grunau, Laetitia Perfus-Barbeoch.

42 **Funding**

43 This work was supported by INRAE and the French Government (National Research  
44 Agency, ANR) through the ANR-18-CE20-0002 (ADMIRE), LABEX SIGNALIFE ANR-

45 11-LABX-0028 and IDEX UCAJedi ANR-15-IDEX-0 programs. With the support of  
46 LabEx CeMEB, an ANR « Investissements d'avenir » program (ANR-10-LABX-04-01).  
47 This study is set within the framework of the « Laboratoire d'Excellence (LabEx) »  
48 TULIP (ANR-10-LABX-41).  
49  
50

51 **Abstract**

52 In model organisms, epigenome dynamics underlies a plethora of biological processes.  
53 The role of epigenetic modifications in development and parasitism in nematode pests  
54 remains unknown. The root-knot nematode *Meloidogyne incognita* adapts rapidly to  
55 unfavorable conditions, despite its asexual reproduction. However, the mechanisms  
56 underlying this remarkable plasticity and their potential impact on gene expression  
57 remain unknown. This study provides the first insight into contribution of epigenetic  
58 mechanisms to this plasticity, by studying histone modifications in *M. incognita*. The  
59 distribution of five histone modifications revealed the existence of strong epigenetic  
60 signatures, similar to those found in the model nematode *Caenorhabditis elegans*. We  
61 investigated their impact on chromatin structure and their distribution relative to  
62 transposable elements (TE) loci. We assessed the influence of the chromatin  
63 landscape on gene expression at two developmental stages: eggs, and pre-parasitic  
64 juveniles. H3K4me3 histone modification was strongly correlated with high levels of  
65 expression for protein-coding genes implicated in stage-specific processes during *M.*  
66 *incognita* development. We provided new insights in the dynamic regulation of  
67 parasitism genes kept under histone modifications silencing. In this pioneering study,  
68 we establish a comprehensive framework for the importance of epigenetic  
69 mechanisms in the regulation of the genome expression and its stability in plant-  
70 parasitic nematodes.

71 **Keywords:** Histone modifications, Epigenetics, Root-knot nematode, Development,  
72 Parasitism.

73

74

75 **Author summary**

76 The nematode *Meloidogyne incognita* is one of the most destructive plant parasites  
77 worldwide. Its ability to infect a wide range of hosts and its high adaptability contribute  
78 to its parasitic success. We investigated the role of epigenetic mechanisms —  
79 specifically post-translational histone modifications — in the parasitic life cycle. We  
80 showed these modifications are linked to gene expression regulation and likely  
81 contribute to nematode development and pathogenicity.

82

## 83 **Introduction**

84 Crops are continually attacked by a wide range of pests and parasites. Plant-parasitic  
85 nematodes are thought to be one of the main causes of damages in food crops,  
86 resulting in yield losses of more than \$150 billion worldwide [1]. Root knot nematodes  
87 (RKN), *Meloidogyne spp*, are among the most rapidly spreading of all crop pests and  
88 pathogens [2]. Their rapid spread may have been facilitated by their wide host range,  
89 high fecundity, and parthenogenetic reproduction, allowing infestations to become  
90 established with relatively few individuals [1]. Understanding the determinants of the  
91 extreme adaptive capacity of RKN is crucial for the development of effective and  
92 sustainable control methods.

93 *Meloidogyne incognita* is the most ubiquitous RKN with an obligate biotroph lifestyle.  
94 It feeds exclusively on living cells within the vascular cylinder of the root [3]. The freshly  
95 hatched second-stage pre-parasitic juveniles (J2s) within the soil are attracted to the  
96 root tip of the host plant. These microscopic J2s (400  $\mu\text{m}$  long and 15  $\mu\text{m}$  wide) invade  
97 host roots close to the root elongation zone, through the physical and enzymatic  
98 destruction of plant cell walls in the root epidermis, eventually reaching the vascular  
99 cylinder, where they establish a permanent feeding site [4]. To this end, infective  
100 juveniles secrete molecules known as effectors, to induce major cellular changes in  
101 recipient host cells and evade plant defense responses. These effector proteins are  
102 translocated directly from the secretory gland cells into the host cells by a syringe-like  
103 structure, called stylet [5]. The tissue around the permanent feeding site typically  
104 shows signs of hyperplasia, resulting in the characteristic knot-like shape of roots  
105 infected with RKN. Once they begin feeding, the J2s become sedentary, going through  
106 three molts before becoming mature adults. The females release eggs onto the root  
107 surface, and embryogenesis within the eggs is followed by the first molt, generating

108 second-stage juveniles. Males are produced in unfavorable conditions (e.g., resistant  
109 host), and they migrate out of the plant without developing further and without playing  
110 a role in reproduction [6].

111 Despite its mitotic parthenogenetic mode of reproduction, presumably resulting in low  
112 genetic plasticity, *M. incognita* can adapt rapidly to unfavorable conditions [7,8]. The  
113 mechanisms underlying this adaptability have yet to be elucidated. Population  
114 genomics analyses have revealed only low genome variability at the SNP level  
115 between *M. incognita* isolates across the globe [8]. Furthermore, these point mutations  
116 did not correlate with the ranges of compatible plant host species. A follow-up  
117 population genomics study on Japanese isolates [9] confirmed the low genome  
118 variability at the SNP level but identified some correlations with infection compatibility  
119 of different cultivars of the same plant species (sweet potato). Taken together, these  
120 studies suggest point mutations are not the sole genome plasticity factors involved in  
121 the adaptive evolution of *M. incognita*. Consequently, other genome plasticity factors  
122 have also been investigated in this species, including movements of transposable  
123 elements (TE) and gene copy number variations (CNV). High similarity between TE  
124 copies and their consensus sequences suggest they have been recently active in the  
125 *M. incognita* genome [10]. Studying variations of their frequencies across geographical  
126 isolates allowed identification of isolate-specific TE insertions, including in coding or  
127 regulatory regions, suggesting TE movements might constitute a genome plasticity  
128 factor with functional consequences. However, no evidence yet for an adaptive role of  
129 these movements were shown in this species and nothing is known about the  
130 mechanisms underlying their regulation or amplification. In addition, convergent gene  
131 CNV have been shown to correlate with rapid breaking down of tomato plant  
132 resistance, suggesting an adaptive role, although causative relation has not yet been

133 shown [11] and the underlying mechanisms are also unknown. Because a strategy to  
134 explain *M. incognita*'s capacity to adapt in a fast-fluctuating environment is lacking,  
135 investigating whether epigenetic mechanisms do occur and have possible impact on  
136 genome regulation is timely. Indeed, the epigenetic control of transposable elements  
137 has been identified as an important factor of genome evolution [12]. Furthermore, the  
138 epigenome dynamics of multicellular organisms are associated with transitions in cell  
139 cycle development, germline specification, gametogenesis, and inheritance. Within the  
140 cell, nuclear DNA is packaged and ordered into chromatin by histone proteins [13,14].  
141 Chromatin can adopt different conformational states directly influencing gene  
142 expression, from relaxed transcriptionally active euchromatin to condensed  
143 transcriptionally inactive heterochromatin. Specific enzymes regulate histone structure  
144 and function through chemical modifications to the histone proteins, such as  
145 acetylation and methylation. In many organisms, euchromatin displays an enrichment  
146 in the di- (or tri-) methylation of the lysine 4 residue of histone 3 (H3K4me3), whereas  
147 heterochromatin displays enrichment in the trimethylation of the lysine 9 or lysine 27  
148 residue of histone 3 (H3K9me3 and H3K27me3) [15]. Specific combinations of histone  
149 modifications are associated with transcriptionally permissive or repressive chromatin  
150 structures, thereby controlling gene expression at the transcriptional level [16]. Other  
151 organisms, such as *Saccharomyces cerevisiae*, display an unusual regulation of  
152 histone modifications, with a lack of H3K9me3 modification and the establishment of  
153 alternative modifications defining the silent state of chromatin [17].  
154 Chromatin immunoprecipitation followed by high-throughput sequencing (ChIP-seq) is  
155 a powerful method for generating genome-wide maps of interactions between proteins  
156 and DNA, including posttranslational histone modifications, and for mapping histone  
157 variants [18]. Extensive epigenetic studies have been performed in the model

158 nematode *Caenorhabditis elegans*, addressing its functional genomic elements,  
159 including histone modifications in response to the environment [19]. Previous studies  
160 have shown that *M. incognita* lacks 5-methylcytosine (5mC) and has no cytosine-DNA  
161 (cytosine-5)-methyltransferase 1 (DNMT1) or DNMT3 [20,21] which is similar to what  
162 is known for *C. elegans* [22]. Low-level DNA N(6)-methylation (6mA-DNA) has been  
163 identified as an alternative carrier of epigenetic information in *C. elegans* [23].  
164 However, the physiological relevance of 6-mA-DNA remains unclear. Apart from this  
165 model species, the role of chromatin modifications has not been studied in nematodes.  
166 The studies performed to date have been limited to bioinformatics analyses indicating  
167 that potential homologs of canonical histone-modifying enzymes are conserved in the  
168 genomes of *C. elegans* and two parasitic nematodes, the food-borne animal parasite  
169 *Trichinella spiralis* and the plant parasite *M. incognita* [21,24]. Epigenetic regulation is  
170 considered a key mechanism of parasite adaptation, and its role in plant-nematode  
171 interactions is an emerging field of study [25].

172 Deciphering histone modifications and their effects on gene transcription is important  
173 for understanding the key parameters underlying biological processes, including  
174 parasitic success in RKN. This study provides the first insight of the genome-wide  
175 epigenetic landscape of *M. incognita* and its direct relationship to gene transcription.  
176 Using ChIP-seq, we first analyzed the distribution of five posttranslational histone  
177 modifications. We then investigated the impact of these modifications on chromatin  
178 structure and their co-distribution relative to TE-rich regions. Finally, we assessed the  
179 influence of the chromatin landscape on gene expression during developmental, with  
180 a focus on parasitism genes, such as those encoding effectors.



## 181 **Results**

### 182 **The chromatin landscape of five histone modifications in *M. incognita***

183 We performed ChIP-Seq analysis to study posttranslational histone modifications in *M.*  
184 *incognita*. We first checked the specificity of a set of commercially available antibodies  
185 and optimized the binding and sonication steps. Four out of 15 available antibodies  
186 previously used in *C. elegans* passed the two-step validation process [26]. These  
187 antibodies gave single bands on western blots and saturated signals on ChIP-titration  
188 (S1 Fig, S1 Table). They were raised specifically against H3K27ac, H4K20me1,  
189 H3K9me3 and H3K27me3, and were added to the first previously validated antibody  
190 raised against H3K4me3 [20]. ChIP-Seq data were obtained for two RKN  
191 developmental stages, eggs and pre-parasitic juveniles 2 (J2s), and were mapped to  
192 the most complete annotated *M. incognita* genome publicly available [27]. Regions  
193 displaying a specific enrichment in histone modifications were identified (S2 Fig),  
194 making study of the chromatin landscape based on these five histone modifications  
195 meaningful.

196 We investigated the distribution of histone modifications in the *M. incognita* genome  
197 further, by calculating the genomic frequencies of each histone modification and of the  
198 31 histone modification combinations detected genome-wide (Table 1). These  
199 frequencies correspond to the percentage of the total genome (~184 Mb divided by a  
200 bin size of 500 bp each) covered by each histone modification. In both eggs and J2s,  
201 H3K4me3 was the most prevalent histone modification, covering 13.9% and 14.6% of  
202 the genome, respectively. By contrast, H3K9me3, H3K27me3, H4K20me1 and  
203 H3K27ac each covered less than 4% of the genome. Very little difference in the  
204 frequencies of these modifications was observed between eggs and J2s (Table 1).

205 Histone modifications can act together in a combinatorial manner to exert different  
206 effects on the genome. The most frequent histone combinations observed in both eggs  
207 and J2s involved H4K20me1+H3K27me3, or H4K20me1+H3K9me3, or  
208 H4K20me1+H3K27me3+H3K9me3, with frequencies ranging between 1.3% and 2%.  
209 The other 23 combinations presented relatively low coverage, with a frequency of less  
210 than 1%. In total, ~35% of the *M. incognita* genome was covered by the five histone  
211 modifications and their combinations (Table 1). Overall, these results reveal a  
212 consistent chromatin landscape during *M. incognita* eggs-to-J2s transition based on  
213 the five post translational histone modifications considered here.  
214

215 **Table 1. Overall coverage frequencies of ChIP-Seq data.**

| Histone modification combination            | Whole-genome coverage in eggs (bp) | Whole-genome coverage in J2s (bp) | Proportion of whole genome in eggs (%) | Proportion of whole genome in J2s (%) | Proportion in TE in eggs (%) | Proportion in TE in J2s (%) |
|---------------------------------------------|------------------------------------|-----------------------------------|----------------------------------------|---------------------------------------|------------------------------|-----------------------------|
| [H3K4me3]                                   | 25,235,500                         | 26,575,000                        | 13.861                                 | 14.597                                | 2.899                        | 3.129                       |
| [H4K20me1]                                  | 6,900,000                          | 6,535,000                         | 3.79                                   | 3.59                                  | 1.747                        | 2.104                       |
| [H3K9me3]                                   | 6,379,000                          | 6,033,500                         | 3.504                                  | 3.314                                 | 8.614                        | 7.108                       |
| [H3K27me3]                                  | 4,036,000                          | 5,004,500                         | 2.217                                  | 2.749                                 | 1.73                         | 2.421                       |
| [H3K9me3+H4K20me1]                          | 3,676,500                          | 3,062,500                         | 2.019                                  | 1.682                                 | 5.944                        | 4.756                       |
| [H3K27ac]                                   | 2,991,500                          | 2,528,000                         | 1.643                                  | 1.389                                 | 0.434                        | 0.386                       |
| [H3K27me3+H3K9me3+H4K20me1]                 | 2,737,500                          | 2,499,500                         | 1.504                                  | 1.373                                 | 4.283                        | 4.05                        |
| [H3K27me3+H4K20me1]                         | 2,698,000                          | 3,431,500                         | 1.482                                  | 1.885                                 | 1.387                        | 2.239                       |
| [H3K27ac+H4K20me1]                          | 1,857,500                          | 1,478,000                         | 1.02                                   | 0.812                                 | 0.29                         | 0.214                       |
| [H3K4me3+H3K9me3]                           | 1,580,500                          | 836,000                           | 0.868                                  | 0.459                                 | 0.18                         | 0.115                       |
| [H3K27ac+H3K27me3+H4K20me1]                 | 1,519,000                          | 1,643,500                         | 0.834                                  | 0.903                                 | 0.362                        | 0.434                       |
| [H3K4me3+H4K20me1]                          | 1,263,500                          | 1,263,000                         | 0.694                                  | 0.694                                 | 0.194                        | 0.168                       |
| [H3K27ac+H3K4me3]                           | 685,000                            | 624,500                           | 0.376                                  | 0.343                                 | 0.091                        | 0.082                       |
| [H3K27me3+H3K9me3]                          | 657,500                            | 656,000                           | 0.361                                  | 0.36                                  | 0.643                        | 0.617                       |
| [H3K27ac+H3K27me3+H3K9me3+H4K20me1]         | 545,000                            | 403,500                           | 0.299                                  | 0.222                                 | 0.792                        | 0.379                       |
| [H3K27ac+H3K27me3]                          | 481,000                            | 544,500                           | 0.264                                  | 0.299                                 | 0.096                        | 0.089                       |
| [H3K27ac+H3K4me3+H4K20me1]                  | 480,000                            | 439,000                           | 0.264                                  | 0.241                                 | 0.053                        | 0.05                        |
| [H3K4me3+H3K9me3+H4K20me1]                  | 258,000                            | 164,500                           | 0.142                                  | 0.09                                  | 0.098                        | 0.06                        |
| [H3K27ac+H3K9me3+H4K20me1]                  | 251,000                            | 221,000                           | 0.138                                  | 0.121                                 | 0.238                        | 0.072                       |
| [H3K27me3+H3K4me3]                          | 194,500                            | 188,500                           | 0.107                                  | 0.104                                 | 0.031                        | 0.022                       |
| [H3K27ac+H3K9me3]                           | 149,000                            | 246,000                           | 0.082                                  | 0.135                                 | 0.034                        | 0.038                       |
| [H3K27ac+H3K4me3+H3K9me3]                   | 108,500                            | 67,000                            | 0.06                                   | 0.037                                 | 0.019                        | 0.017                       |
| [H3K27ac+H3K4me3+H3K9me3+H4K20me1]          | 109,500                            | 76,500                            | 0.06                                   | 0.042                                 | 0.043                        | 0.024                       |
| [H3K27ac+H3K27me3+H3K4me3+H3K9me3+H4K20me1] | 94,500                             | 75,000                            | 0.052                                  | 0.041                                 | 0.154                        | 0.086                       |
| [H3K27ac+H3K27me3+H3K4me3+H4K20me1]         | 91,000                             | 109,500                           | 0.05                                   | 0.06                                  | 0.014                        | 0.022                       |
| [H3K27me3+H3K4me3+H4K20me1]                 | 63,000                             | 76,500                            | 0.035                                  | 0.042                                 | 0.007                        | 0.017                       |
| [H3K27me3+H3K4me3+H3K9me3+H4K20me1]         | 55,000                             | 28,000                            | 0.03                                   | 0.015                                 | 0.036                        | 0.046                       |
| [H3K27ac+H3K27me3+H3K9me3]                  | 49,000                             | 92,500                            | 0.027                                  | 0.051                                 | 0.017                        | 0.026                       |
| [H3K27me3+H3K4me3+H3K9me3]                  | 44,000                             | 21,500                            | 0.024                                  | 0.012                                 | 0.017                        | 0.007                       |
| [H3K27ac+H3K27me3+H3K4me3]                  | 25,500                             | 33,000                            | 0.014                                  | 0.018                                 | 0.007                        | 0.014                       |
| [H3K27ac+H3K27me3+H3K4me3+H3K9me3]          | 6,500                              | 13,500                            | 0.004                                  | 0.007                                 | 0                            | 0                           |
| <b>Total</b>                                | <b>65,222,000</b>                  | <b>64,970,500</b>                 | <b>35.825</b>                          | <b>35.687</b>                         | <b>30.454</b>                | <b>28.792</b>               |

216  
 217 Overall alignment (bp) and genomic coverage percentage of H3K4me3, H3K9me3, H3K27ac, H3K27me3 and  
 218 H4K20me1 histone modifications and their combinations over the whole *M. incognita* genome and the Transposable  
 219 Element annotations (TE), for Egg and J2 samples. *M. incognita* genome has been fragmented *in silico* into 500 bp  
 220 bins on which histone modification enrichment was predicted with a posterior probability > 0.5. If a histone  
 221 modification was predicted, the corresponding 500bp bin was counted. Coverage frequencies were calculated  
 222 based on 184 Mb total *M. incognita* genome size. Three biological replicates of *M. incognita* eggs and J2s have  
 223 been treated jointly to identify common histone modification enrichment using ChromstaR.

224

## 225 **M. incognita displays canonical distribution for histone modifications**

226 We used ChromstaR [28] to analyze the spatial pattern of statistically significant  
227 enrichment in each histone modification associated with different functional genomic  
228 elements in *M. incognita*. These associations provide clues for the functions and  
229 regulatory mechanisms of histone modifications. Spatial enrichment was calculated  
230 and represented as a heatmap for both eggs and J2s (Fig 1 and S3 Fig, respectively).  
231 Enrichment level was calculated for all the available annotations for the *M. incognita*  
232 genome: coding sequence (CDS), exon, 5'-untranslated region (UTR), messenger  
233 RNA (mRNA), non-coding RNA (ncRNA), ribosomal RNA (rRNA), TE, 3'-UTR and  
234 tRNA.

235 We observed a highly significant enrichment in H3K4me3 for sequences annotated as  
236 related to protein-coding genes (CDS, exon, UTRs and mRNA) and various types of  
237 non-protein-coding RNA genes (ncRNA and tRNA), this enrichment being strongest  
238 for the 5'-UTR. An enrichment of H3K27me3 was also observed in the 5'-UTR,  
239 however the enrichment in this modification was weak for other gene-related  
240 annotations. H3K4me3 modifications were observed less frequently than expected for  
241 rRNA and TE. H3K9me3 enrichment was observed for almost all genomic annotations,  
242 particularly for TE, but not for rRNA. Interestingly, rRNA genes displayed a relative  
243 depletion for all five histone modifications. Finally, the levels of enrichment in H3K27ac,  
244 H3K27me3 and H4K20me1 were highest for tRNA genes. A similar enrichment  
245 distribution was observed in J2s (S3 Fig).

246 Histone modifications associated with genomic elements were visualized on the  
247 longest scaffold, Minc3s00001, as an example (Fig 2). For H3K4me3, sharp peaks  
248 overlapping with the transcriptional start site (TSS/5'-UTR) were observed. For  
249 H3K9me3, peaks overlapping both protein-coding genes and TEs were observed,

250 whereas H3K27ac, H3K27me3 and H4K20me1 yielded broad shapes and  
251 distributions. The distribution and enrichment patterns of histone modifications suggest  
252 a canonical role of H3K9me3 in TE repression and of H3K4me3 in promoting protein-  
253 coding gene expression (S4 Fig).

### 254 **Transposable element orders display preferential enrichment in H3K9me3**

255 TEs are important drivers of genomic plasticity in *M. incognita* [10]. The genome-wide  
256 annotation of *M. incognita* TEs identified retrotransposons and DNA-transposons, such  
257 as terminal inverted repeats (TIR), miniature inverted repeat transposable elements  
258 (MITEs), helitrons, maverick elements, long terminal repeats (LTR), long and short  
259 interspersed nuclear elements (LINE and SINE), terminal-repeat retrotransposons in  
260 miniature (TRIM), and large retrotransposon derivatives (LARD) [10]. We calculated  
261 the frequency of histone modifications associated with TE annotations (Table 1). In  
262 both eggs and J2s, H3K9me3 had the highest frequency, covering 8.6% and 7.1% of  
263 annotated TEs, respectively. By contrast, H3K4me3, H4K20me1, H3K27me3 and  
264 H3K27ac had lower frequencies, ranging from 0.3 to 2.9%. Three histone modification  
265 combinations, involving H4K20me1, were also present at a high frequency (1.4% to  
266 5.9%) at annotated TEs. The other 23 histone combinations covered less 1% of the  
267 annotated TE. We found that H3K9me3 was observed more frequently than expected  
268 in association with all TE orders except SINE (Fig 3). H4K20me1 modification was  
269 observed more frequently in four TE orders (TRIM, MITE, TIR and helitron). By  
270 contrast, H3K4me3, H3K27ac and H3K27me3 displayed a lower association with all  
271 TE orders. The enrichment of most TE subfamilies in H3K9me3 supports the  
272 hypothesis of a role for this histone modification in repressing TE, consistent with  
273 conservation of the canonical role of this modification in *M. incognita*.

274 **The H3K4me3 modification is associated with higher levels of gene expression**  
275 **during nematode development**

276 Histone modifications are known to regulate the spatiotemporal expression of protein-  
277 coding genes [29], and, thus, developmental processes. Early in the development of  
278 *M. incognita*, the transition from eggs to J2s constitutes a dramatic change in  
279 environment for the nematode, because the mobile J2s are released into the soil after  
280 hatching. We evaluated changes in both the pattern of histone modifications and gene  
281 expression during this transition, by determining the number of protein-coding genes  
282 overlapping each area of enrichment in particular histone modifications and their  
283 combinations (Table 2). We found that 13,322 of the 43,718 annotated *M. incognita*  
284 protein-coding genes were associated with at least one histone modification in eggs,  
285 whereas 23,470 genes were associated with at least one histone modification in J2s.  
286 At both developmental stages, H3K4me3 modification was associated with the largest  
287 number of genes (6,014 in eggs and 10,564 in J2s), followed by H3K9me3,  
288 H4K20me1, H3K27me3 and H3K27ac. The most prevalent histone modification  
289 combinations were the H3K9me3+H4K20me1 combination in eggs, which was  
290 associated with 531 genes, and the H3K27me3+H4K20me1 combination in J2s, which  
291 was associated with 803 genes.

292

293

**Table 2. Distribution of histone modifications in relation to protein-coding genes.**

| Histone modifications and combinations    | Associated genes in eggs | Associated genes in J2s |
|-------------------------------------------|--------------------------|-------------------------|
| <b>H3K4me3</b>                            | <b>6014</b>              | <b>10564</b>            |
| <b>H3K9me3</b>                            | <b>1762</b>              | <b>3475</b>             |
| <b>H4K20me1</b>                           | <b>1212</b>              | <b>2127</b>             |
| <b>H3K27me3</b>                           | <b>829</b>               | <b>1831</b>             |
| <b>H3K27ac</b>                            | <b>756</b>               | <b>1047</b>             |
| H3K9me3+H4K20me1                          | 531                      | 699                     |
| H3K27me3+H3K9me3+H4K20me1                 | 362                      | 571                     |
| H3K27me3+H4K20me1                         | 360                      | 803                     |
| H3K27ac+H4K20me1                          | 250                      | 299                     |
| H3K4me3+H3K9me3                           | 221                      | 253                     |
| H3K27ac+H3K27me3+H4K20me1                 | 181                      | 400                     |
| H3K4me3+H4K20me1                          | 150                      | 221                     |
| H3K27ac+H3K4me3                           | 138                      | 211                     |
| H3K27me3+H3K9me3                          | 96                       | 220                     |
| H3K27ac+H3K27me3                          | 93                       | 166                     |
| H3K27ac+H3K27me3+H3K9me3+H4K20me1         | 66                       | 92                      |
| H3K27ac+H3K4me3+H4K20me1                  | 57                       | 105                     |
| H3K4me3+H3K9me3+H4K20me1                  | 42                       | 35                      |
| H3K27me3+H3K4me3                          | 41                       | 66                      |
| H3K27ac+H3K9me3+H4K20me1                  | 40                       | 54                      |
| H3K27ac+H3K9me3                           | 26                       | 79                      |
| H3K27ac+H3K4me3+H3K9me3+H4K20me1          | 22                       | 16                      |
| H3K27ac+H3K4me3+H3K9me3                   | 17                       | 19                      |
| H3K27ac+H3K27me3+H3K4me3+H4K20me1         | 14                       | 28                      |
| H3K27ac+H3K27me3+H3K4me3+H3K9me3+H4K20me1 | 13                       | 22                      |
| H3K27ac+H3K27me3+H3K9me3                  | 8                        | 31                      |
| H3K27ac+H3K27me3+H3K4me3                  | 7                        | 10                      |
| H3K27me3+H3K4me3+H4K20me1                 | 5                        | 8                       |
| H3K27me3+H3K4me3+H3K9me3+H4K20me1         | 4                        | 7                       |
| H3K27me3+H3K4me3+H3K9me3                  | 3                        | 4                       |
| H3K27ac+H3K27me3+H3K4me3+H3K9me3          | 2                        | 7                       |
| <b>Total</b>                              | <b>13322</b>             | <b>23470</b>            |

294

295

296

297

298

299

Numbers of *M. incognita*'s annotated protein-coding genes associated with H3K4me3, H3K9me3, H3K27ac, H3K27me3 and H4K20me1 histone modifications and their combinations, for Egg and J2 samples. Protein-coding genes were considered to be associated with a histone modification if at least 1 bp of the protein-coding gene annotation overlapped with the identified histone modification.

300 We then assessed the impact of each histone modification on gene expression (Fig 4).  
301 According to ChIP-seq and RNA-seq data, 10,242 genes in eggs and 18,577 genes in  
302 J2s were both expressed and associated with at least one histone modification.  
303 The distribution of gene expression values was shifted towards the highest median  
304 values for H3K4me3, and toward the lowest median values for the histone  
305 modifications H3K9me3 and H3K27me3 (Fig 4A-B). The other two known histone  
306 modifications, H3K27ac and H4K20me1 modifications, were associated with  
307 intermediate levels of gene expression (Fig 4A-B). These observations are consistent  
308 with observations for *C. elegans*, in which euchromatic regions with active transcription  
309 are enriched in H3K4me3 and H3K27ac, whereas regions with low levels of  
310 transcription activity are enriched in H3K9me3 and H3K27me3 [30].  
311 We analyzed the top and bottom 10% of protein-coding genes ranked according to  
312 expression levels, to explore the proximal regulatory elements. We extended the area  
313 of overlap considered to 2 kb upstream and downstream from the protein-coding  
314 genes, with ChromstaR (Fig 5). For the top 10% of expressed genes at both stages,  
315 H3K4me3 enrichment overlapped start codon, implying that this histone modification  
316 occurs preferentially at the TSS of highly expressed genes (Fig 5A and Fig 5C).  
317 H3K27ac presented a “flat” profile, indicating a lack of evident enrichment. For  
318 H3K27me3, H3K9me3 and H4K20me1, the log(expected/observed) value was below  
319 zero, indicating that the most strongly expressed genes were depleted in these histone  
320 modifications. By contrast, the enrichment profile of H3K4me3 in the 10% of genes  
321 with the lowest levels of expression appeared as a “valley”, indicating depletion (Fig  
322 5B and Fig 5D). The H3K27ac, H3K9me3, H3K27me3 and H4K20me1 signals were  
323 flat between and around the genes (Fig 5B and Fig5D).



324 Finally, during the eggs-to-J2s transition, a change in the distribution of H3K4me3 was  
325 observed, with this modification disappearing from the TSS of underexpressed genes  
326 and becoming enriched at the TSS of overexpressed genes. This change in the  
327 distribution show a dynamic in histone modifications. However, it was less  
328 straightforward to establish a direct correlation between gene expression levels and  
329 the presence/absence of other histone modifications. The pattern of association  
330 between histone modifications and annotated protein-coding genes was, therefore,  
331 robust only for H3K4me3, and was associated with an expression switch during the  
332 eggs-to-J2s transition.

### 333 **Stage-specific enrichment in GO terms for genes associated with H3K4me3**

334 Given the strong association of H3K4me3 with the higher expression of protein-coding  
335 gene expression, we compared functional annotations in eggs and J2s. We identified  
336 6,014 genes in eggs and 10,564 genes in J2s as associated with H3K4me3. We then  
337 annotated the corresponding *M. incognita* proteins thanks to Interproscan [21].  
338 Enrichment was detected for 46 GO terms in eggs and 8 GO terms in J2s (Fig 6). GO  
339 terms such as “ribonucleoside- and nucleoside-associated processes” were  
340 associated with the egg stage, whereas compounds identified in the metabolic  
341 processes’ ontology such as “ether”, “citrate” and “tricarboxylic acid” were specifically  
342 enriched in the J2 stage. We also identified 40 GO terms as displaying enrichment at  
343 both stages, with the strongest enrichment observed for processes related to protein  
344 biosynthesis: “translation”, “peptide biosynthetic process”, “peptide metabolic  
345 process”, “amide biosynthetic process”, “cellular amide metabolic process” (Fig 6).  
346 Our observations of H3K4me3 dynamics during the eggs-to-J2s transition led us to  
347 analyze the functions of the products of the differentially expressed genes. We  
348 identified 89 genes in eggs and 177 genes in J2s as both associated with H3K4me3

349 and differentially expressed. Overrepresentation was detected for 39 GO terms  
350 specific to eggs (56/89 genes), and 9 GO terms specific to J2s (28/177 genes). GO  
351 terms linked to genomic organization and cell cycle-associated processes were  
352 associated with the egg stage, whereas cell signaling, and stimulus responses were  
353 specific to the J2 stage (Fig 7).

354 The identification of orthologs in *C. elegans* and parasitic nematodes provided insight  
355 into the functions of the H3K4me3-associated genes differentially expressed during  
356 the eggs-to-J2s transition. We found 63 genes in *M. incognita* eggs and 119 genes in  
357 J2s for which at least one ortholog was present in *C. elegans*. Interestingly, orthologs  
358 of genes linked to the regulation of histones, DNA metabolism, cytoskeleton  
359 organization and the mitotic checkpoint were overrepresented among the most  
360 expressed genes in *M. incognita* eggs (Table S2). In *M. incognita* J2s, we identified  
361 orthologous genes involved in redox status and the regulation of cell trafficking (Table  
362 S3).

### 363 **RKN effector-coding genes are subject to regulation by histone modifications**

364 Effectors are secreted proteins that are essentials to nematode parasitism. Studies  
365 using RNA-Seq technology provided a comprehensive transcriptome profiling of *M.*  
366 *incognita* effector-producing glands and an opportunity to characterize their different  
367 patterns on infective aptitude, from the penetration to the successful interaction leading  
368 to feeding sites and the production of the next generation of eggs [31,32]. In *M.*  
369 *incognita*, subventral glands (SvG) are mostly active during the earliest steps, whereas  
370 dorsal gland (DG) is active in the latest steps of the infection. A total of 48 and 34  
371 putative non-redundant *M. incognita* effectors have been identified in SvG and DG,  
372 respectively [31]. We looked for histone modification associated with effector genes  
373 that are overexpressed in J2s. Among the 48 SvG effectors, 14 were associated with

374 both a histone modification dynamic and a differential expression pattern during eggs-  
375 to-J2s transition. Only two of those effectors, Mi-GSTS1 and msp2, showed an  
376 appearance of activating histone modification in J2s. In contrast, combinations of  
377 histone modifications involving the repressive modifications H3K27me3 and H3K9me3  
378 appeared to be the most abundant in this class of effectors (Table 3, S4 Table). Among  
379 the 34 DG effectors, 4 were associated with both a histone modification dynamic and  
380 a differential expression pattern during eggs-to-J2s transition. All of them were  
381 associated with combinations of repressive histone modifications (Table 4, S5 Table).  
382 Interestingly, the Mi-14-3-3-b DG effector exhibits reverse dynamics during the  
383 transition from eggs to J2s with a repression of expression in J2s associated with the  
384 appearance of H3K27me3. Altogether, these results suggest that histone modifications  
385 act as crucial regulators to precisely produce some effectors in a dose manner and in  
386 temporal sequence during parasitism.  
387

388 **Table 3. Transcriptional regulation of known subventral glands (SvG) effector genes.**

| Gene numbers according to Da Rocha et al., 2021                                                                                             | Gene names according to literature | Log2(Fold-change J2s/Eggs) | Gene              | HPTM_eggs                   | HPTM_J2s                    |
|---------------------------------------------------------------------------------------------------------------------------------------------|------------------------------------|----------------------------|-------------------|-----------------------------|-----------------------------|
| <b>Effector genes associated with a differential expression level during eggs-to-J2s transition</b>                                         |                                    |                            |                   |                             |                             |
| 7                                                                                                                                           | 31H06 (msp22)                      | 3.57                       | Minc3s00376g11251 | □                           | □                           |
| 47                                                                                                                                          | SXP-RAL2=Mi-SXP-1                  | 4.08                       | Minc3s00381g11354 | □                           | □                           |
| 27                                                                                                                                          | Mi-PG1                             | 5.59                       | Minc3s00007g00481 | □                           | □                           |
| 2                                                                                                                                           | 2B02B (Mi-PEL2)                    | 6.12                       | Minc3s00094g04359 | □                           | □                           |
| 26                                                                                                                                          | Mi-PEL2                            | 6.40                       | Minc3s00566g14364 | □                           | □                           |
| 35                                                                                                                                          | Minc03325                          | 7.55                       | Minc3s00020g01295 | □                           | □                           |
| 21                                                                                                                                          | CL5Contig2_1-EST (Sec-2)           | 2.30                       | Minc3s00113g04971 | [H3K4me3]                   | [H3K4me3]                   |
| 33                                                                                                                                          | Minc01696                          | 4.48                       | Minc3s00036g02098 | [H3K9me3]                   | [H3K9me3]                   |
| <b>Effector genes associated with both a histone modification dynamic and a differential expression level during eggs-to-J2s transition</b> |                                    |                            |                   |                             |                             |
| 25                                                                                                                                          | Mi-GSTS1                           | 2.14                       | Minc3s00365g11068 | □                           | [H3K4me3]                   |
| 6                                                                                                                                           | 30H07 (msp20)                      | 2.95                       | Minc3s05190g37766 | □                           | [H3K27ac+H3K27me3+H4K20me1] |
| 13                                                                                                                                          | 8D05 (msp9)                        | 3.20                       | Minc3s01244g22037 | □                           | [H3K9me3]                   |
| 18                                                                                                                                          | CL312Contig1_1-EST                 | 3.90                       | Minc3s00070g03486 | [H3K4me3+H4K20me1]          | [H3K4me3]                   |
| 3                                                                                                                                           | 2G02 (msp2)                        | 3.96                       | Minc3s00855g18130 | □                           | [H4K20me1]                  |
| 14                                                                                                                                          | 8E08B (Eng4)                       | 5.04                       | Minc3s00139g05823 | □                           | [H3K9me3]                   |
| 48                                                                                                                                          | Mi-PEL1                            | 6.09                       | Minc3s00441g12378 | □                           | [H3K27me3]                  |
| 8                                                                                                                                           | 34C04 (Mi-PL1)                     | 6.14                       | Minc3s01107g20785 | [H4K20me1]                  | [H3K27me3]                  |
| 29                                                                                                                                          | Mi-VAP2                            | 6.33                       | Minc3s01051g20218 | □                           | [H3K27ac+H3K27me3+H4K20me1] |
| 23                                                                                                                                          | Mi-CBP1 (42G06)                    | 6.51                       | Minc3s00139g05824 | [H3K27me3]                  | [H3K9me3]                   |
| 43                                                                                                                                          | Minc13292                          | 6.99                       | Minc3s00083g03979 | [H3K9me3]                   | □                           |
| 10                                                                                                                                          | 5A12B (ENG1, ENG3)                 | 8.51                       | Minc3s03138g32920 | □                           | [H3K27ac+H3K27me3+H4K20me1] |
| 24                                                                                                                                          | Mi-ENG1 (1C11B)                    | 8.53                       | Minc3s03136g32914 | □                           | [H3K27me3+H4K20me1]         |
| 37                                                                                                                                          | Minc03866                          | 8.67                       | Minc3s00066g03327 | [H3K27me3+H3K9me3+H4K20me1] | [H3K9me3]                   |

389

390 According to the literature [31], 48 non-redundant *M. incognita* effectors have been identified in SvG (i.e., columns:  
 391 effector-gene number, gene name and accession number on *M. incognita* genome). For this study, SvG effector  
 392 genes were classified according to both their expression level and flanking histone modifications during eggs-to-  
 393 J2s transition. Differential gene expression is shown as RNA-seq fold expression changes, Log2(Fold Change),  
 394 calculated using DESeq2 on triplicates, with a p value < 0.05 as a threshold for overexpression. Effector genes  
 395 were considered to be associated with a histone modification if at least 1 bp of the annotation overlapped with an  
 396 identified histone modification. Three biological replicates of *M. incognita* eggs and J2s have been treated jointly to  
 397 identify common histone modification enrichment using ChromstaR. □ indicates no histone modification has been  
 398 identified.

399

400 **Table 4. Transcriptional regulation of known dorsal gland (DG) effector genes.**

| Gene numbers according to Da Rocha et al., 2021                                                                                      | Gene names according to literature | Log2(Fold-change J2s/Eggs) | Gene              | HPTM_egg            | HPTM_juvenile       |
|--------------------------------------------------------------------------------------------------------------------------------------|------------------------------------|----------------------------|-------------------|---------------------|---------------------|
| Effector genes associated with a differential expression level during eggs-to-J2s transition                                         |                                    |                            |                   |                     |                     |
| 28                                                                                                                                   | Minc12639                          | 3.18                       | Minc3s00340g10545 | []                  | []                  |
| 25                                                                                                                                   | Minc01595                          | 3.90                       | Minc3s01184g21493 | [H3K27me3+H4K20me1] | [H3K27me3+H4K20me1] |
| Effector genes associated with both a histone modification dynamic and a differential expression level during eggs-to-J2s transition |                                    |                            |                   |                     |                     |
| 12                                                                                                                                   | 34F06 (msp24)                      | 2.68                       | Minc3s00321g10151 | [H3K27me3]          | [H3K27me3+H3K9me3]  |
| 26                                                                                                                                   | Minc02097 (35A02, msp25)           | 4.80                       | Minc3s00202g07465 | []                  | [H3K27me3]          |
| 9                                                                                                                                    | 25B10 (msp33)                      | 4.99                       | Minc3s03649g34419 | []                  | [H3K9me3]           |
| 16                                                                                                                                   | 6F06 (msp4)                        | 5.65                       | Minc3s02324g29465 | [H3K9me3]           | []                  |
| 23                                                                                                                                   | Mi-14-3-3                          | -3.43                      | Minc3s00122g05244 | []                  | [H3K27me3]          |

401  
402 According to the literature [31], 34 non-redundant *M. incognita* effectors have been identified in DG (i.e., columns:  
403 effector-gene number, gene name and accession number on *M. incognita* genome). For this study, DG effector  
404 genes were classified according to both their expression level and flanking histone modifications during eggs-to-  
405 J2s transition. Differential gene expression is shown as RNA-seq fold expression changes, Log2(Fold Change),  
406 calculated using DESeq2 on triplicates, with a p value < 0.05 as a threshold for overexpression. Effector genes  
407 were considered to be associated with a histone modification if at least 1 bp of the annotation overlapped with an  
408 identified histone modification. Three biological replicates of *M. incognita* eggs and J2s have been treated jointly to  
409 identify common histone modification enrichment using ChromstaR. [] indicates no histone modification has been  
410 identified.

## 411 **Discussion**

412 Many biological processes involve chromatin changes, including the delimitation of  
413 functional elements in the genome and transcription regulation, particularly during  
414 complex parasitic life cycles. The RKN *M. incognita* has a wide host range and is found  
415 worldwide. Despite its clonal reproduction, *M. incognita* can rapidly adapt to  
416 unfavorable conditions [7,8]. Epigenetic mechanisms may contribute to this rapid  
417 adaptation and the parasitic success of this nematode. Cytosine methylation is absent,  
418 or present at only very low levels, in the *M. incognita* genome, which contains no genes  
419 encoding DNA methyltransferases [20,21]. Conversely, histone (de)acetylation and  
420 (de)methylation enzymes are present and conserved in the genome of *M. incognita*  
421 [21]. However, the role of histone modifications in phytoparasitic nematode biology  
422 remains unknown. We deciphered the chromatin landscape in the RKN *M. incognita*  
423 by studying five histone modifications and analyzing their dynamics during  
424 development. These modifications were not randomly distributed in *M. incognita* and  
425 colocalized with genomic elements, forming specific epigenetic signatures.

426 In the model nematode *C. elegans*, H3K4me3 enrichment is observed in actively  
427 expressed regions and therefore associated with euchromatin. By contrast, H3K9me3  
428 and H3K27me3 enrichment is observed in silent genes, transposons, and other  
429 repetitive sequences and as such associated with heterochromatic regions. This  
430 histone code is observed in most organisms [33,34]. However, these histone  
431 modifications do not have the same biological implications in some organisms [35].  
432 H3K4me3 activates gene expression by a charge-mediated decompaction of the  
433 chromatin at promoter sequences [36]. H3K4me3 is usually distinguished by sharp  
434 peaks or enrichment around the TSS [37]. In *M. incognita*, we observed a typical profile  
435 of this type, with the sharp H3K4me3 peaks overlapping with the TSS of annotated

436 protein-coding genes, associated with higher levels of gene expression. The  
437 conservation of the canonical function of H3K4me3 in *M. incognita* will pave the way  
438 for deciphering transcriptional regulation during development and parasitism.

439 Another activating histone modification, H4K20me1, typically results in diffuse  
440 chromatin modifications [38]. In *M. incognita*, H4K20me1 displayed a diffuse profile of  
441 this type over the entire genome and was associated with higher levels of expression  
442 than the repressive histone modifications. H4K20me1 levels have been shown to  
443 change dynamically during the cell cycle, peaking during the G2/M phase [39]. At the  
444 whole-organism scale, dynamic changes in H4K20 methylation have been observed  
445 during mouse preimplantation development, with this modification playing a key role in  
446 the maintenance of genome integrity [40]. *M. incognita* seems to have the same  
447 histone modification machinery as model organisms, and we can, therefore, predict  
448 analogous functions for H4K20me1 in cell cycle regulation and the maintenance of  
449 genome integrity in this nematode.

450 Another well-described histone modification is the heterochromatin-associated  
451 modification H3K9me3 [41], which plays an important role in regulating gene  
452 expression [42] and is characterized by distinct peaks at protein-coding genes [43].  
453 H3K9me3 is also associated with TEs, which require controlled repression to prevent  
454 chaotic transposition in the genome. This modification has been described as the  
455 principal regulator of these elements in mouse embryonic stem cells [43] and in *C.*  
456 *elegans* [33]. In *M. incognita*, H3K9me3 presented sharp peaks in the bodies of genes  
457 with low levels of expression relative to other histone modifications. Moreover, the  
458 majority of H3K9me3 modifications were found on annotated TE, suggesting that  
459 H3K9me3 represses the mobile elements of the genome and indicating that its  
460 canonical function is also conserved in *M. incognita*.

461 Different sets of histone modifications can account for gene expression [44]. For  
462 instance, a balance between H3K27 trimethylation and H3K27 acetylation has been  
463 shown to regulate gene expression in a dynamic manner [45]. H3K27me3 is a broadly  
464 distributed repressive histone modification that downregulates gene expression, as  
465 demonstrated during development and cell differentiation [46,47]. By contrast,  
466 H3K27ac is an activating histone modification that may be broadly distributed [48] or  
467 display narrow peaks [49]. In *M. incognita*, H3K27me3 and H3K27ac were broadly  
468 distributed throughout the genome despite their dual effects. H3K27ac is usually found  
469 on enhancers and can be used to distinguish between active and poised enhancers  
470 [50]. H3K27ac was associated with genes displaying higher levels of expression than  
471 those associated with repressive modifications in *M. incognita*. As in mammals, studies  
472 of H3K27ac enrichment could potentially be used to predict enhancers in *M. incognita*  
473 on the basis of local chromatin structure. Other sets of histone modifications may fine-  
474 tune regulation of the chromatin landscape, but their identification was limited by  
475 antibody availability and specificity in *M. incognita*.

476 Different combinations of histone modifications can be colocalized, acting together as  
477 activators, repressors or in a bivalent manner [51]. For instance, gene expression  
478 levels have been shown to be regulated by the ratio of H3K27Me3 to H3K4Me3  
479 modifications, leading to a bivalent outcome: repression or activation [51]. In *M.*  
480 *incognita*, H3K27me3 enrichment was observed at the 5'UTR, potentially accounting  
481 for the low levels of expression for the associated genes. The colocalization of  
482 H3K27me3 and H3K4me3 at the 5' UTR suggests bivalency for these two  
483 modifications in *M. incognita*. H3K27me3 enrichment was also found within tRNA-  
484 genes, suggesting a role for this modification in tRNA regulation, consistent with the



485 presence of H3K27me3 near the RNA polymerase III binding sites used for the  
486 synthesis of tRNA in human embryonic stem cells [52].

487 Our findings indicate that histone modification is conserved *in M. incognita* and defines  
488 a reproducible and consistent landscape. We therefore further investigated the  
489 dynamics of histone modifications during development and parasitism, by considering  
490 the egg and juvenile stages. This developmental transition constitutes a major change  
491 in the nematode environment. J2s hatch and are released into the soil, in which they  
492 begin their life as mobile entities, moving towards the plant roots. The soil is a radically  
493 different environment from the eggs, and the newly hatched J2s must therefore adapt  
494 very rapidly to this new environment. At the scale of the genome, we found that the  
495 histone modification profile and gene expression level remained relatively stable during  
496 development. However, dynamical changes were highlighted during the eggs-to-J2s  
497 transition in *M. incognita*, in analyses at gene level. We identified pathways relating to  
498 the cell cycle as overrepresented in eggs, promoting *M. incognita* development. By  
499 contrast, J2s presented pathways linked to stimulus responses, reflecting the needs of  
500 J2s following their release into the soil after hatching, consistent with previous  
501 observations [31]. Furthermore, based on *C. elegans* orthology, egg stage-specific  
502 genes were involved in cell division, whereas J2s-specific genes were mainly involved  
503 in redox status regulation, reflecting the environment shift during the *M. incognita* life  
504 cycle. The identification of such candidate genes in *M. incognita* highlights the  
505 involvement of histone modifications in nematode development and could lead to the  
506 identification of new targets for pest control.

507 Histone modifications also contribute to the parasitic success of many animal or plant  
508 parasites. Parasites possess an arsenal of molecules known as effectors, which  
509 promote infection success. Fungal species, such as *Fusarium graminearum* or

510 *Leptosphaeria maculans*, are the principal plant-parasitic organisms displaying  
511 chromatin-based control of concerted effector gene expression at specific times during  
512 infection [53,54]. In *Zymoseptoria tritici*, the H3K27me3 distribution dictates effector  
513 gene expression during host colonization, preventing the expression of these genes  
514 when not required [55].

515 The association of J2s-overexpressed effector-coding genes with histone  
516 modifications suggests that epigenetic regulation contributes to *M. incognita*  
517 parasitism. However, by contrast to what we observed for stage-specific genes, the  
518 overexpression of effectors in J2s was not associated with H3K4me3, whatever the  
519 secretory gland, SvG and DG. For effectors, overexpression in J2s is mainly  
520 associated with combinations of repressive histone modifications. The overexpression  
521 of effector-coding genes needed at a specific time point, such as cell wall degrading  
522 enzymes during juvenile stage which help to the penetration of the nematode into the  
523 root system, may be under strong and complex regulation. In that respect, having  
524 effector-coding genes under repressive histone modifications could help the nematode  
525 to fine-tune their expression in a spatio-temporal way during plant infection. For  
526 instance, different histone modification dynamics may account for the coordinated, yet  
527 slightly different, expression of 2 pectate lyase genes, Mi-pel-1, and Mi-pel-2, during  
528 *M. incognita* infection of roots. Indeed, while these 2 genes were both overexpressed  
529 in early J2s stage (with similar fold-changes), only Mi-pel-1 gene was associated with  
530 repressive H3K27me3. Potential release of this repressive histone modification may  
531 provide an explanation for the expression of Mi-pel-1 only at late J2s stage, as  
532 previously reported [56].

533 Another example is the Mi-14-3-3-b DG effector gene which was the only one  
534 overexpressed in eggs and showing appearance of a H3K27me3 modification during

535 the eggs-to-J2s transition. This result correlates with what is already known about the  
536 expression pattern of Mi-14-3-3-b during *M. incognita* infection with an early expression  
537 in eggs, a strong repression in J2s and a late expression in the female stage [57].  
538 More generally, these results suggest that the fine-tuning of effector production during  
539 parasitism could be achieved through either another activating histone modification,  
540 still to be studied, or a different process such as transcription factors (TFs) activation.  
541 Consistent with this, a putative cis-regulatory element “Mel-DOG” has been identified  
542 in *M. incognita* DG effector promoters [31]. This might be the missing activator switch  
543 for the expression of DG effector genes at specific stages during the lifecycle of the  
544 nematode, even if the associated TFs are yet to be discovered. To achieve precise  
545 and accurate regulation of effector-genes, TFs and histones modifications may work  
546 in a cooperative way.

## 547 **Conclusion**

548 We describe here the chromatin landscape of a parasitic nematode, revealing a  
549 dynamic process during the life cycle. This pioneering study shows that *M. incognita*  
550 presents a histone modification similar to that of the model nematode *C. elegans*.  
551 Beyond model organisms, the epigenome arguably plays an important role in  
552 development and the regulation of parasitism. The next step will be to decipher the  
553 epigenetic response of *M. incognita* to environmental changes, such as host  
554 adaptation, in greater detail.

## 555 **Materials and Methods**

### 556 **Biological materials**

557 One-month-old tomato plants, *Solanum lycopersicum* (St Pierre), were inoculated with  
558 soil infested with *M. incognita*. Eggs were collected from tomato roots seven-week-old  
559 after infection, by grinding, sterilizing, and filtering, as previously described [58].  
560 Extracted eggs were purified by centrifugation on a 30% sucrose gradient, washed and  
561 either stored at -80°C for subsequent experiments or kept in autoclaved tap water, at  
562 room temperature, for seven days, to produce juveniles J2s. Hatched J2s were  
563 collected by filtration and centrifugation (13,000 x g, 1 min) and stored at -80°C.

### 564 **Antibody screening**

565 Commercially available antibodies raised against histones with posttranslational  
566 modifications were selected on the basis of two criteria: ChIP-grade and preferentially  
567 used in the model nematode *C. elegans* (Table S1). We assessed the specificity of  
568 each antibody in *M. incognita* by a two-step method combining western blotting and  
569 ChIP-titration, as described by Cosseau [26].

### 570 **Western blot**

571 Nematodes were resuspended in a homemade extraction buffer (3% SDS, 10%  
572 sucrose, 0.2 M DTT, 1.25 mM sodium butyrate, and 62.5 M Tris/Cl pH 6.8) and crushed  
573 with a glass Dounce homogenizer for 2 minutes. Samples were sonicated (Vibra  
574 Cell™) three times, at 70% intensity, for 15 s each, with cooling on ice during the  
575 intervals. They were then boiled for 5 minutes at 99°C after the addition of Laemmli  
576 buffer (Cat. #1410737, Biorad). Proteins were separated by SDS-PAGE and  
577 transferred to a membrane with a Trans Blot TURBO (Biorad). The membrane was  
578 incubated for 1 h at 37°C in a homemade blocking buffer (50 mM NaCl, 0.05% Tween  
579 20, 5% fat-free dry milk, 20 mM Tris/Cl pH 7) and then for 1.5 hours with antibodies in

580 the blocking buffer. Finally, the membrane was washed and incubated with a  
581 secondary antibody. Signals were detected by incubation with SuperSignal West Pico  
582 Chemiluminescent Substrate (Thermo Fisher Scientific, Cat.34579) and to the use of  
583 ChemiDoc Imaging systems (Biorad). Antibodies that did not bind to a unique target  
584 were discarded from the analysis (S1 Table and S1 Fig).

### 585 **Crosslinking and chromatin immunoprecipitation (ChIP)**

586 Frozen eggs or juveniles were resuspended in 500  $\mu$ L Hank's balanced salt solution  
587 (HBSS, Sigma-Aldrich, Cat. #H4641, Lot RNBG1861) and crushed with a glass  
588 Dounce homogenizer for 7 min. We then added 500  $\mu$ L 1 x HBSS and transferred the  
589 solution to an Eppendorf tube. Samples were centrifuged (at 2,700 x  $g$ , 5 min, 4°C).  
590 For crosslinking, the pellet was resuspended in 1 mL 1 x HBSS containing 13.5  $\mu$ L of  
591 37% formaldehyde (Sigma-Aldrich, Cat. #252549), and incubated for 10 min at room  
592 temperature, with occasional inversion. Binding was stopped by adding 57  $\mu$ L 2 M  
593 glycine (Diagenode, cat. C01011000) and incubating the sample for 5 min at room  
594 temperature. Samples were centrifuged at 2,700 x  $g$ , 4°C for 5 min. The pellet was  
595 rinsed twice, with 1 mL 1 x HBSS each, and centrifuged again (2,700 x  $g$ , 4°C for 5  
596 min). ChIP was performed with the Auto-Chipmentation Kit for histones (Diagenode,  
597 cat. C01011000). Crosslinked chromatin was resuspended in 100  $\mu$ L cold lysis buffer  
598 IL1 and incubated at 4°C for 10 min in a rotating well. Following centrifugation (2,700  
599 x  $g$ , 4°C for 5 min), the supernatant was discarded, and the pellet was resuspended in  
600 100  $\mu$ L cold lysis buffer IL2, and incubated in a rotating well for 10 min at 4°C. The  
601 suspension was centrifuged (2,700 x  $g$ , 4°C for 5 min) and the pellet was resuspended  
602 in 100  $\mu$ L of complete shearing buffer iS1. Samples were sonicated with the Bioruptor  
603 Pico, over 5 cycles (30 s ON and 30 s OFF). They were then transferred to new tubes  
604 and centrifuged (16,000 x  $g$ , 10 min, 4°C). The supernatants were transferred to new

605 tubes, pooled by batch and 500  $\mu$ L iS1 was added. The ChIPmentation program was  
606 selected on the Diagenode SX-8G IP-Star Compact. We used the following  
607 parameters: 3 hours of antibody coating at 4°C, 13 hours of IP reaction at 4°C, 10 min  
608 wash at 4°C and 5 min tagmentation. All steps were performed with the intermediate  
609 mixing speed.

610 ChIP-buffer, antibody coating mix and immunoprecipitation mix were prepared in  
611 accordance with the supplied protocol. Stripping, end repair and reverse cross-linking  
612 were performed with the reagents provided with the kit.

### 613 **Titration by qPCR**

614 The immunoprecipitated DNA was quantified by qPCR with a LightCycler480 (Roche  
615 System). The PCR mix was prepared with 2  $\mu$ L of immunoprecipitated chromatin, in a  
616 final volume of 10  $\mu$ L (0.5  $\mu$ L of each primer, 5  $\mu$ L of Eurogentec Takyon™ SYBR® 2  
617 x qPCR Mastermix Blue). The following Light-Cycler run protocol was used:  
618 denaturation at 95°C for 3 min; amplification and quantification (40 cycles), 95°C for  
619 30s, 60°C for 30s, 72°C for 30s. Cycle threshold (Ct) was determined with the fit point  
620 method of LightCycler480 version 1.5. PCR was performed in triplicate, and the mean  
621 Ct was calculated.

622 Percent input recovery (%IR) was calculated as described by Cosseau [26], with the  
623 following formula:  $\%IR = 100(E^{Ct(input)-Ct(IPbound)})$  where E is primer efficiency,  
624 Ct(input) is the Ct of the unbound fraction, and Ct(IPbound) is the Ct of the  
625 immunoprecipitated sample. Only antibodies reaching saturation were considered  
626 specific and were used for ChIP-Seq experiments, at their optimal concentration (S1  
627 Table and S1 Fig).

628

### 629 **ChIP-Seq**

630 The same ChIP protocol was performed with the Auto-Chipmentation kit for histones  
631 (Diagenode,cat. C01011000), with specific antibodies validated for *M. incognita*,  
632 targeting the histone modifications H3K4me3 (Merck Millipore ref 04-745, batch  
633 2452485), H3K9me3 (Abcam ref ab8898, batch GR306402-2), H3K27ac (Abcam ref  
634 ab4729, batch GR150367-2), H3K27me3 (Epigentek ref A-4039, batch 503019) and  
635 H4K20me1 (Abcam ref ab9051, batch GR158874-1). For each antibody, ChIP was  
636 performed in biological triplicate on two different *M. incognita* stages: eggs and J2s.  
637 The ChIP control was the input-control, consisting of a fraction of sheared chromatin  
638 without immunoprecipitation [59].

639 Illumina libraries were constructed with primer indices provided by the Auto-  
640 Chipmentation kit for histones (Diagenode,cat. C01011000), according to the protocols  
641 supplied. The amount of DNA was determined and adjusted by qPCR quantification.  
642 Amplified libraries were quantified on a Bioanalyzer and sequenced by the  
643 BioEnvironnement platform (University of Perpignan, France) with an Illumina NextSeq  
644 550 instrument generating 75 bp single-end reads. Sequencing reads have been  
645 deposited in the NCBI Sequence Read Archive (SRA, NCBI), under accession number  
646 PRJNA725801.

#### 647 **ChIP-Seq data analysis**

648 Graphical representations were generated, and statistical analyses were performed  
649 with R version 3.6.1 ([www.r-project.org](http://www.r-project.org)) and the following libraries: chromstaR,  
650 cowplot, bamsignals, gplots, reshape2, tidyverse, ggpubr and rstatix.

651 Illumina read quality was analyzed with FastQC [60]. Read trimming was performed  
652 with Trim Galore ([http://www.bioinformatics.babraham.ac.uk/projects/trim\\_galore/](http://www.bioinformatics.babraham.ac.uk/projects/trim_galore/)),  
653 using the default parameters. Processed reads were mapped onto the reference  
654 genome of *M. incognita* [27] with Bowtie2, using “Very sensitive end-to-end” presets

655 [61]. All library sizes were downsampled to the size of the smallest library we had,  
656 corresponding to 3.7 million reads.

657 Peak calling for domain visualization in the *M. incognita* genome was performed with  
658 Peakranger [62]. A fraction of sheared chromatin without immunoprecipitation has  
659 been used as input to subtract the background level. Normalized tracks were visualized  
660 with the Integrative Genome Viewer [63]. Biological replicates were treated  
661 independently, and reproducibility was checked manually (S2 Fig).

662 Enriched domain identification and chromatin state analysis were performed with  
663 ChromstaR, using the differential mode with default parameters, except for bin size  
664 and step size, which were set at 500 bp and 250 bp, respectively [28]. ChromstaR uses  
665 a hidden Markov model approach to predict domains displaying enrichment. The three  
666 biological replicates were treated jointly by ChromstaR to generate the HMM model.  
667 Peak prediction for each histone modification was defined by a posterior probability >  
668 0.5.

669 The genomic frequencies of the histone modifications were calculated with ChromstaR  
670 and correspond to the percentage of bin sizes (~500 bp) with histone modifications  
671 and their combinations (defined as the overlapping of multiple modifications on the  
672 same bin) over the 184 Mb of the *M. incognita* genome. As an example, H3K4me3  
673 frequency (%) corresponds to the total covered bases (~25MB) divided by the genome  
674 size (~184MB) and multiplied by 100.

675 Analyses of enrichment at genomic elements were performed by plotting ChromstaR  
676 heatmaps. Heatmaps were generated from the  $\log_{10}(\text{observed/expected})$  ratio.  
677 The “expected” parameter corresponds to the probability of a bin to be both a genomic  
678 element and marked with histone modification at the same location. The “observed”  
679 parameter constitutes the frequency of a bin corresponding to be both a genomic



680 element and marked with histone modification at the same location. When the ratio is  
681  $> 0$ , the genomic element is observed more frequently than expected and considered  
682 as statistically enriched with the histone modification. We used genome annotation  
683 data from a previous genome sequencing analysis of *M. incognita*, including 43,718  
684 protein-coding genes (corresponding to mRNA annotation) [27]. Furthermore,  
685 canonical TEs were annotated and filtered using REPET [10,60].

686 Regions of differential enrichment were determined with a minimum differential  
687 posterior, to detect pairwise differences at  $p=0.9999$ .

### 688 **Transcription analysis and histone modification profile**

689 RNA-seq data were provided by previous analyses of different life stages, eggs and  
690 J2s, of the nematode [27]. Data was reprocessed by Kozłowski and coworkers [10], to  
691 generate FPKM values. Raw FPKM values were transformed to obtain  $\text{Log}(\text{median}$   
692  $\text{FPKM}+1)$  values, keeping the median of the three biological replicates as a  
693 representative value. Raw FPKM values are available online [64]. The number of  
694 genes associated with histone modifications was calculated by determining whether  
695 the gene position overlapped a position of histone modification enrichment by at least  
696 1 bp. A boxplot representing the levels of gene expression associated with the five  
697 histone modifications was generated for genes for which expression data were  
698 available. A Kruskal-Wallis test was performed, followed by a pairwise Dunn test, to  
699 identify significant differences in gene expression level between different histone  
700 modifications, with a  $p$  value  $< 0.05$  was considered significant.

701 The mean enrichment profiles were calculated by ChromstaR, based on the  
702  $\text{log}(\text{expected}/\text{observed})$  enrichment from 2 kb upstream to 2 kb downstream from the  
703 protein-coding genes, considering only the top and bottom 10% of genes ranked  
704 according to expression level associated with the five histone modifications.

705 Differentially expressed genes were identified using previous RNA-seq data [27,65]  
706 processed by DE-seq2 [66], a  $p$  value  $< 0.05$  was considered significant and a fold-  
707 change  $> 2$  for overexpression.

#### 708 **GO enrichment analysis**

709 GO term enrichment was analyzed with the R package GOfuncR, using default  
710 parameters. The FWER cutoff was set at 0.05 to identify overrepresented GO terms.  
711  $(-)\text{Log}_{10}(\text{pvalue})$  was calculated for the representation of GO terms, more specifically  
712 "Biological Processes". All *M. incognita* genes associated with GO terms were used  
713 as references for GO enrichment analysis (i) for genes associated with H3K4me3 only;  
714 and (ii) for genes both associated with H3K4me3 only and differentially expressed  
715 during eggs-to-J2s transition.

716 *M. incognita* orthologs were identified from a previous work [21] using  
717 FamilyCompanion to identify orthologous links with 20 other species. Searches for GO  
718 terms for *C. elegans* orthologs were performed with the functional classification  
719 included in the PANTHER webtool [67].

720

721

## 722 **Acknowledgments**

723 We would like to thank Jean-François Allienne and the IHPE team (Perpignan, France)  
724 for ChIP sample preparation and sequencing. We thank Dr. Marc Bailly-Bechet, Dr.  
725 Dominique Collinet, Julie Dazenière, Dr. Georgios Koutsovoulos and Dr. Djampa  
726 Kozlowski (ISA Sophia Antipolis, France) for assistance with and discussions about  
727 data analysis and statistics. We also thank Yongpan Chen, Dr. Joffrey Mejias, Yara  
728 Nourredine, Laura Perrot and Salomé Soulé (ISA Sophia Antipolis, France) for their  
729 help in the preparation of biological materials and fruitful discussion. We also thank Dr.  
730 Michael Quentin (ISA Sophia Antipolis, France) for help with effector analysis. We  
731 thank all the members of the IPN team for insightful discussions and technical help.  
732 We also thank Corinne Rancurel and PlantBios's BIG bioinformatics platform for  
733 technical support (ISA Sophia Antipolis, France).

734

## 735 **References**

- 736 1. Singh SK, Hodda M, Ash GJ. Plant-parasitic nematodes of potential phytosanitary  
737 importance, their main hosts and reported yield losses. *EPPPO Bull* [Internet]. 2013  
738 Aug;43(2):334–74. Available from: <http://doi.wiley.com/10.1111/epp.12050>
- 739 2. Bebbler DP, Holmes T, Gurr SJ. The global spread of crop pests and pathogens. *Glob*  
740 *Ecol Biogeogr* [Internet]. 2014 Dec;23(12):1398–407. Available from:  
741 <http://doi.wiley.com/10.1111/geb.12214>
- 742 3. Caillaud M-C, Dubreuil G, Quentin M, Perfus-Barbeoch L, Lecomte P, de Almeida  
743 Engler J, et al. Root-knot nematodes manipulate plant cell functions during a compatible  
744 interaction. *J Plant Physiol* [Internet]. 2008 Jan;165(1):104–13. Available from:  
745 <https://linkinghub.elsevier.com/retrieve/pii/S0176161707001344>
- 746 4. Favery B, Dubreuil G, Chen M-S, Giron D, Abad P. Gall-Inducing Parasites: Convergent  
747 and Conserved Strategies of Plant Manipulation by Insects and Nematodes. *Annu Rev*  
748 *Phytopathol* [Internet]. 2020 Aug 25;58(1):1–22. Available from:  
749 <http://www.ncbi.nlm.nih.gov/pubmed/32853101>
- 750 5. Mejias J, Truong NM, Abad P, Favery B, Quentin M. Plant Proteins and Processes  
751 Targeted by Parasitic Nematode Effectors. *Front Plant Sci* [Internet]. 2019 Jul 30;10:970.  
752 Available from: <https://www.frontiersin.org/article/10.3389/fpls.2019.00970/full>
- 753 6. Castagnone-Sereno P. Genetic variability and adaptive evolution in parthenogenetic  
754 root-knot nematodes. *Heredity (Edinb)* [Internet]. 2006 Apr 11;96(4):282–9. Available  
755 from: <http://www.nature.com/articles/6800794>
- 756 7. Castagnone-Sereno P, Danchin EGJ. Parasitic success without sex - the nematode  
757 experience. *J Evol Biol* [Internet]. 2014 Jul;27(7):1323–33. Available from:  
758 <http://doi.wiley.com/10.1111/jeb.12337>
- 759 8. Koutsovoulos GD, Marques E, Arguel M, Duret L, Machado ACZ, Carneiro RMDG, et  
760 al. Population genomics supports clonal reproduction and multiple independent gains  
761 and losses of parasitic abilities in the most devastating nematode pest. *Evol Appl*  
762 [Internet]. 2020 Feb 6;13(2):442–57. Available from:

- 763 <https://onlinelibrary.wiley.com/doi/abs/10.1111/eva.12881>  
764 9. Asamizu E, Shirasawa K, Hirakawa H, Iwahori H. Root-knot nematode genetic diversity  
765 associated with host compatibility to sweetpotato cultivars. *Mol Plant Pathol* [Internet].  
766 2020 Aug 17;21(8):1088–98. Available from:  
767 <https://onlinelibrary.wiley.com/doi/abs/10.1111/mpp.12961>  
768 10. Kozłowski DKL, Hassanaly-Goulamhousen R, Da Rocha M, Koutsovoulos GD,  
769 Bailly-Bechet M, Danchin EGJ. Movements of transposable elements contribute to the  
770 genomic plasticity and species diversification in an asexually reproducing nematode  
771 pest. *Evol Appl* [Internet]. 2021 May 5;eva.13246. Available from:  
772 <https://onlinelibrary.wiley.com/doi/10.1111/eva.13246>  
773 11. Castagnone-Sereno P, Mulet K, Danchin EGJ, Koutsovoulos GD, Karaulic M, Da Rocha  
774 M, et al. Gene copy number variations as signatures of adaptive evolution in the  
775 parthenogenetic, plant-parasitic nematode *Meloidogyne incognita*. *Mol Ecol* [Internet].  
776 2019 May 29;28(10):2559–72. Available from:  
777 <https://onlinelibrary.wiley.com/doi/abs/10.1111/mec.15095>  
778 12. Choi JY, Lee YCG. Double-edged sword: The evolutionary consequences of the  
779 epigenetic silencing of transposable elements. Betancourt A, editor. *PLOS Genet*  
780 [Internet]. 2020 Jul 16 [cited 2021 Apr 22];16(7):e1008872. Available from:  
781 <https://doi.org/10.1371/journal.pgen.1008872>  
782 13. Gornik SG, Ford KL, Mulhern TD, Basic A, McFadden GI, Waller RF. Loss of  
783 Nucleosomal DNA Condensation Coincides with Appearance of a Novel Nuclear  
784 Protein in Dinoflagellates. *Curr Biol* [Internet]. 2012 Dec;22(24):2303–12. Available  
785 from: <https://linkinghub.elsevier.com/retrieve/pii/S0960982212012572>  
786 14. Talbert PB, Henikoff S. Histone variants — ancient wrap artists of the epigenome. *Nat*  
787 *Rev Mol Cell Biol* [Internet]. 2010 Apr 3;11(4):264–75. Available from:  
788 <http://www.nature.com/articles/nrm2861>  
789 15. Soyer JL, El Ghalid M, Glaser N, Ollivier B, Linglin J, Grandaubert J, et al. Epigenetic  
790 Control of Effector Gene Expression in the Plant Pathogenic Fungus *Leptosphaeria*  
791 *maculans*. Talbot NJ, editor. *PLoS Genet* [Internet]. 2014 Mar 6;10(3):e1004227.  
792 Available from: <https://dx.plos.org/10.1371/journal.pgen.1004227>  
793 16. Strahl BD, Allis CD. The language of covalent histone modifications. *Nature* [Internet].  
794 2000 Jan 6;403(6765):41–5. Available from:  
795 <http://www.ncbi.nlm.nih.gov/pubmed/10638745>  
796 17. O’Kane CJ, Hyland EM. Yeast epigenetics: the inheritance of histone modification  
797 states. *Biosci Rep* [Internet]. 2019 May 31;39(5). Available from:  
798 [https://portlandpress.com/bioscirep/article/doi/10.1042/BSR20182006/219163/Yeast-](https://portlandpress.com/bioscirep/article/doi/10.1042/BSR20182006/219163/Yeast-epigenetics-the-inheritance-of-histone)  
799 [epigenetics-the-inheritance-of-histone](https://portlandpress.com/bioscirep/article/doi/10.1042/BSR20182006/219163/Yeast-epigenetics-the-inheritance-of-histone)  
800 18. Meyer CA, Liu XS. Identifying and mitigating bias in next-generation sequencing  
801 methods for chromatin biology. *Nat Rev Genet* [Internet]. 2014 Nov 16;15(11):709–21.  
802 Available from: <http://www.nature.com/articles/nrg3788>  
803 19. Weinhouse C, Truong L, Meyer JN, Allard P. *Caenorhabditis elegans* as an emerging  
804 model system in environmental epigenetics. *Environ Mol Mutagen* [Internet]. 2018  
805 Aug;59(7):560–75. Available from: <http://doi.wiley.com/10.1002/em.22203>  
806 20. Perfus-Barbeoch L, Castagnone-Sereno P, Reichelt M, Fneich S, Roquis D, Pratz L, et  
807 al. Elucidating the molecular bases of epigenetic inheritance in non-model invertebrates:  
808 the case of the root-knot nematode *Meloidogyne incognita*. *Front Physiol* [Internet].  
809 2014 Jun 6;5. Available from:  
810 <http://journal.frontiersin.org/article/10.3389/fphys.2014.00211/abstract>  
811 21. Pratz L, Rancurel C, Rocha M Da, Danchin EGJ, Castagnone-Sereno P, Abad P, et al.  
812 Genome-wide expert annotation of the epigenetic machinery of the plant-parasitic

- 813 nematodes *Meloidogyne* spp ., with a focus on the asexual species. *BMC Genomics*.  
814 2017;
- 815 22. Wenzel D, Palladino F, Jedrusik-Bode M. Epigenetics in *C. elegans*: Facts and  
816 challenges. *genesis* [Internet]. 2011 Aug;49(8):647–61. Available from:  
817 <http://doi.wiley.com/10.1002/dvg.20762>
- 818 23. Greer EL, Blanco MA, Gu L, Sendinc E, Liu J, Aristizábal-Corrales D, et al. DNA  
819 Methylation on N6-Adenine in *C. elegans*. *Cell* [Internet]. 2015 May 7;161(4):868–78.  
820 Available from: <http://www.ncbi.nlm.nih.gov/pubmed/25936839>
- 821 24. Mitreva M, Jasmer DP, Zarlenga DS, Wang Z, Abubucker S, Martin J, et al. The draft  
822 genome of the parasitic nematode *Trichinella spiralis*. *Nat Genet* [Internet]. 2011 Mar  
823 20;43(3):228–35. Available from: <http://www.nature.com/articles/ng.769>
- 824 25. Hewezi T. Epigenetic Mechanisms in Nematode–Plant Interactions. *Annu Rev*  
825 *Phytopathol* [Internet]. 2020 Aug 25;58(1):119–38. Available from:  
826 <https://www.annualreviews.org/doi/10.1146/annurev-phyto-010820-012805>
- 827 26. Cosseau C, Azzi A, Smith K, Freitag M, Mitta G, Grunau C. Native chromatin  
828 immunoprecipitation (N-ChIP) and ChIP-Seq of *Schistosoma mansoni*: Critical  
829 experimental parameters. *Mol Biochem Parasitol* [Internet]. 2009 Jul;166(1):70–6.  
830 Available from: <https://linkinghub.elsevier.com/retrieve/pii/S0166685109000772>
- 831 27. Blanc-Mathieu R, Perfus-Barbeoch L, Aury J-M, Da Rocha M, Gouzy J, Sallet E, et al.  
832 Hybridization and polyploidy enable genomic plasticity without sex in the most  
833 devastating plant-parasitic nematodes. Gojobori T, editor. *PLOS Genet* [Internet]. 2017  
834 Jun 8;13(6):e1006777. Available from:  
835 <https://dx.plos.org/10.1371/journal.pgen.1006777>
- 836 28. Taudt A, Nguyen MA, Heinig M, Johannes F, Colome-Tatche M. chromstaR: Tracking  
837 combinatorial chromatin state dynamics in space and time. *bioRxiv*. 2016; Available  
838 from: <https://doi.org/10.1101/038612>
- 839 29. Stillman B. Histone Modifications: Insights into Their Influence on Gene Expression.  
840 *Cell* [Internet]. 2018 Sep;175(1):6–9. Available from:  
841 <https://linkinghub.elsevier.com/retrieve/pii/S0092867418310481>
- 842 30. Bian Q, Anderson EC, Yang Q, Meyer BJ. Histone H3K9 methylation promotes  
843 formation of genome compartments in *Caenorhabditis elegans* via chromosome  
844 compaction and perinuclear anchoring. *Proc Natl Acad Sci* [Internet]. 2020 May  
845 26;117(21):11459–70. Available from:  
846 <http://www.pnas.org/lookup/doi/10.1073/pnas.2002068117>
- 847 31. Da Rocha M., Bournaud C., Dazenière J., Thorpe P., Pellegrin C., Bailly-Bechet M.,  
848 Péré A., Grynberg P., Perfus-Barbeoch L., Eves-van den Akker S., Danchin E.G.J.  
849 Genome expression dynamics reveals parasitism regulatory landscape of the root-knot  
850 nematode *Meloidogyne incognita* and a promoter motif associated with effector genes.  
851 *GENES*. 2021 (In Press).
- 852 32. Nguyen C-N, Perfus-Barbeoch L, Quentin M, Zhao J, Magliano M, Marteu N, et al. A  
853 root-knot nematode small glycine and cysteine-rich secreted effector, MiSGCR1, is  
854 involved in plant parasitism. *New Phytol* [Internet]. 2018 Jan;217(2):687–99. Available  
855 from: <http://doi.wiley.com/10.1111/nph.14837>
- 856 33. Ahringer J, Gasser SM. Repressive Chromatin in *Caenorhabditis elegans* :  
857 Establishment, Composition, and Function. *Genetics* [Internet]. 2018 Feb;208(2):491–  
858 511. Available from: <https://academic.oup.com/genetics/article/208/2/491-511/6088083>
- 859 34. Barski A, Cuddapah S, Cui K, Roh T-Y, Schones DE, Wang Z, et al. High-Resolution  
860 Profiling of Histone Methylations in the Human Genome. *Cell* [Internet]. 2007  
861 May;129(4):823–37. Available from:  
862 <https://linkinghub.elsevier.com/retrieve/pii/S0092867407006009>

- 863 35. Garcia BA, Hake SB, Diaz RL, Kauer M, Morris SA, Recht J, et al. Organismal  
864 Differences in Post-translational Modifications in Histones H3 and H4. *J Biol Chem*  
865 [Internet]. 2007 Mar;282(10):7641–55. Available from:  
866 <https://linkinghub.elsevier.com/retrieve/pii/S0021925820636079>
- 867 36. Tessarz P, Kouzarides T. Histone core modifications regulating nucleosome structure  
868 and dynamics. *Nat Rev Mol Cell Biol* [Internet]. 2014 Nov 15;15(11):703–8. Available  
869 from: <http://www.nature.com/articles/nrm3890>
- 870 37. Lin B, Lee H, Yoon J-G, Madan A, Wayner E, Tonning S, et al. Global analysis of  
871 H3K4me3 and H3K27me3 profiles in glioblastoma stem cells and identification of  
872 SLC17A7 as a bivalent tumor suppressor gene. *Oncotarget* [Internet]. 2015 Mar  
873 10;6(7):5369–81. Available from: <http://www.ncbi.nlm.nih.gov/pubmed/25749033>
- 874 38. Zang C, Schones DE, Zeng C, Cui K, Zhao K, Peng W. A clustering approach for  
875 identification of enriched domains from histone modification ChIP-Seq data.  
876 *Bioinformatics* [Internet]. 2009 Aug 1;25(15):1952–8. Available from:  
877 [https://academic.oup.com/bioinformatics/article-](https://academic.oup.com/bioinformatics/article-lookup/doi/10.1093/bioinformatics/btp340)  
878 [lookup/doi/10.1093/bioinformatics/btp340](https://academic.oup.com/bioinformatics/article-lookup/doi/10.1093/bioinformatics/btp340)
- 879 39. Oda H, Okamoto I, Murphy N, Chu J, Price SM, Shen MM, et al. Monomethylation of  
880 Histone H4-Lysine 20 Is Involved in Chromosome Structure and Stability and Is  
881 Essential for Mouse Development. *Mol Cell Biol* [Internet]. 2009 Apr 15;29(8):2278–  
882 95. Available from: <https://mcb.asm.org/content/29/8/2278>
- 883 40. SHIKATA D, YAMAMOTO T, HONDA S, IKEDA S, MINAMI N. H4K20  
884 monomethylation inhibition causes loss of genomic integrity in mouse preimplantation  
885 embryos. *J Reprod Dev* [Internet]. 2020;66(5):411–9. Available from:  
886 [https://www.jstage.jst.go.jp/article/jrd/66/5/66\\_2020-036/\\_article](https://www.jstage.jst.go.jp/article/jrd/66/5/66_2020-036/_article)
- 887 41. Lachner M, O'Carroll D, Rea S, Mechtler K, Jenuwein T. Methylation of histone H3  
888 lysine 9 creates a binding site for HP1 proteins. *Nature* [Internet]. 2001  
889 Mar;410(6824):116–20. Available from: <http://www.nature.com/articles/35065132>
- 890 42. Ninova M, Fejes Tóth K, Aravin AA. The control of gene expression and cell identity  
891 by H3K9 trimethylation. *Development* [Internet]. 2019 Oct 1;146(19):dev181180.  
892 Available from: <http://dev.biologists.org/lookup/doi/10.1242/dev.181180>
- 893 43. He J, Fu X, Zhang M, He F, Li W, Abdul MM, et al. Transposable elements are regulated  
894 by context-specific patterns of chromatin marks in mouse embryonic stem cells. *Nat*  
895 *Commun* [Internet]. 2019 Dec 3;10(1):34. Available from:  
896 <http://www.nature.com/articles/s41467-018-08006-y>
- 897 44. Dong X, Weng Z. The correlation between histone modifications and gene expression.  
898 *Epigenomics* [Internet]. 2013 Apr;5(2):113–6. Available from:  
899 <https://www.futuremedicine.com/doi/10.2217/epi.13.13>
- 900 45. Tie F, Banerjee R, Stratton CA, Prasad-Sinha J, Stepanik V, Zlobin A, et al. CBP-  
901 mediated acetylation of histone H3 lysine 27 antagonizes *Drosophila* Polycomb  
902 silencing. *Development* [Internet]. 2009 Sep 15;136(18):3131–41. Available from:  
903 <http://dev.biologists.org/cgi/doi/10.1242/dev.037127>
- 904 46. Boyer LA, Plath K, Zeitlinger J, Brambrink T, Medeiros LA, Lee TI, et al. Polycomb  
905 complexes repress developmental regulators in murine embryonic stem cells. *Nature*  
906 [Internet]. 2006 May 19;441(7091):349–53. Available from:  
907 <http://www.nature.com/articles/nature04733>
- 908 47. Bracken AP. Genome-wide mapping of Polycomb target genes unravels their roles in  
909 cell fate transitions. *Genes Dev* [Internet]. 2006 May 1;20(9):1123–36. Available from:  
910 <http://www.genesdev.org/cgi/doi/10.1101/gad.381706>
- 911 48. Battle SL, Doni Jayavelu N, Azad RN, Hesson J, Ahmed FN, Overbey EG, et al.  
912 Enhancer Chromatin and 3D Genome Architecture Changes from Naive to Primed

- 913 Human Embryonic Stem Cell States. *Stem Cell Reports* [Internet]. 2019  
914 May;12(5):1129–44. Available from:  
915 <https://linkinghub.elsevier.com/retrieve/pii/S2213671119301262>
- 916 49. Ngo V, Chen Z, Zhang K, Whitaker JW, Wang M, Wang W. Epigenomic analysis reveals  
917 DNA motifs regulating histone modifications in human and mouse. *Proc Natl Acad Sci*  
918 [Internet]. 2019 Feb 26;116(9):3668–77. Available from:  
919 <http://www.pnas.org/lookup/doi/10.1073/pnas.1813565116>
- 920 50. Zhang T, Zhang Z, Dong Q, Xiong J, Zhu B. Histone H3K27 acetylation is dispensable  
921 for enhancer activity in mouse embryonic stem cells. *Genome Biol* [Internet]. 2020 Dec  
922 21;21(1):45. Available from:  
923 <https://genomebiology.biomedcentral.com/articles/10.1186/s13059-020-01957-w>
- 924 51. Li F, Wan M, Zhang B, Peng Y, Zhou Y, Pi C, et al. Bivalent Histone Modifications and  
925 Development. *Curr Stem Cell Res Ther* [Internet]. 2018 Jan 19;13(2). Available from:  
926 <http://www.eurekaselect.com/149449/article>
- 927 52. Alla RK, Cairns BR. RNA Polymerase III Transcriptomes in Human Embryonic Stem  
928 Cells and Induced Pluripotent Stem Cells, and Relationships with Pluripotency  
929 Transcription Factors. Emanuelli C, editor. *PLoS One* [Internet]. 2014 Jan  
930 20;9(1):e85648. Available from: <https://dx.plos.org/10.1371/journal.pone.0085648>
- 931 53. Connolly LR, Smith KM, Freitag M. The *Fusarium graminearum* Histone H3 K27  
932 Methyltransferase KMT6 Regulates Development and Expression of Secondary  
933 Metabolite Gene Clusters. Madhani HD, editor. *PLoS Genet* [Internet]. 2013 Oct  
934 31;9(10):e1003916. Available from: <https://dx.plos.org/10.1371/journal.pgen.1003916>
- 935 54. Soyer JL, Rouxel T, Fudal I. Chromatin-based control of effector gene expression in  
936 plant-associated fungi. *Curr Opin Plant Biol* [Internet]. 2015 Aug;26:51–6. Available  
937 from: <https://linkinghub.elsevier.com/retrieve/pii/S136952661500076X>
- 938 55. Meile L, Peter J, Puccetti G, Alassimone J, McDonald BA, Sánchez-Vallet A. Chromatin  
939 Dynamics Contribute to the Spatiotemporal Expression Pattern of Virulence Genes in a  
940 Fungal Plant Pathogen. Di Pietro A, editor. *MBio* [Internet]. 2020 Oct 6;11(5). Available  
941 from: <https://mbio.asm.org/content/11/5/e02343-20>
- 942 56. Huang G, Dong R, Allen R, Davis EL, Baum TJ, Hussey RS. Developmental expression  
943 and molecular analysis of two *Meloidogyne incognita* pectate lyase genes. *Int J Parasitol*  
944 [Internet]. 2005 May;35(6):685–92. Available from:  
945 <https://linkinghub.elsevier.com/retrieve/pii/S0020751905000408>
- 946 57. Sacco MA, Koropacka K, Grenier E, Jaubert MJ, Blanchard A, Goverse A, et al. The  
947 Cyst Nematode SPRYSEC Protein RBP-1 Elicits Gpa2- and RanGAP2-Dependent Plant  
948 Cell Death. Opperman C, editor. *PLoS Pathog* [Internet]. 2009 Aug 28;5(8):e1000564.  
949 Available from: <http://www.ncbi.nlm.nih.gov/pubmed/19714238>
- 950 58. Caillaud M-C, Favery B. In Vivo Imaging of Microtubule Organization in Dividing  
951 Giant Cell. In: *Methods in Molecular Biology* [Internet]. 2016. p. 137–44. Available  
952 from: [http://link.springer.com/10.1007/978-1-4939-3142-2\\_11](http://link.springer.com/10.1007/978-1-4939-3142-2_11)
- 953 59. Park PJ. ChIP-seq: advantages and challenges of a maturing technology. *Nat Rev Genet*  
954 [Internet]. 2009 Oct 8;10(10):669–80. Available from:  
955 <http://www.nature.com/articles/nrg2641>
- 956 60. Andrews S. FastQC - A quality control tool for high throughput sequence data.  
957 <http://www.bioinformatics.babraham.ac.uk/projects/fastqc/>. Babraham Bioinformatics.  
958 2010.
- 959 61. Langmead B, Salzberg SL. Fast gapped-read alignment with Bowtie 2. *Nat Methods*  
960 [Internet]. 2012 Mar 4;9(4):357–9. Available from:  
961 <http://www.ncbi.nlm.nih.gov/pubmed/22388286>
- 962 62. Feng X, Grossman R, Stein L. PeakRanger: A cloud-enabled peak caller for ChIP-seq

- 963 data. BMC Bioinformatics [Internet]. 2011 Dec 9;12(1):139. Available from:  
964 <https://bmcbioinformatics.biomedcentral.com/articles/10.1186/1471-2105-12-139>
- 965 63. Robinson JT, Thorvaldsdóttir H, Wenger AM, Zehir A, Mesirov JP. Variant Review with  
966 the Integrative Genomics Viewer. Cancer Res [Internet]. 2017 Nov 1;77(21):e31–4.  
967 Available from: [http://cancerres.aacrjournals.org/lookup/doi/10.1158/0008-5472.CAN-](http://cancerres.aacrjournals.org/lookup/doi/10.1158/0008-5472.CAN-17-0337)  
968 [17-0337](http://cancerres.aacrjournals.org/lookup/doi/10.1158/0008-5472.CAN-17-0337)
- 969 64. Danchin EGJ, Da Rocha M. M. incognita protein-coding genes expression patterns.  
970 Portail Data INRAE [Internet]. Available from: [https://doi.org/10.15454/YM2DHE.](https://doi.org/10.15454/YM2DHE.2020)  
971 [2020](https://doi.org/10.15454/YM2DHE.2020).
- 972 65. Danchin EGJ, Arguel M-J, Campan-Fournier A, Perfus-Barbeoch L, Magliano M, Rosso  
973 M-N, et al. Identification of Novel Target Genes for Safer and More Specific Control of  
974 Root-Knot Nematodes from a Pan-Genome Mining. Ghedin E, editor. PLoS Pathog  
975 [Internet]. 2013 Oct 31;9(10):e1003745. Available from:  
976 <https://dx.plos.org/10.1371/journal.ppat.1003745>
- 977 66. Love MI, Huber W, Anders S. Moderated estimation of fold change and dispersion for  
978 RNA-seq data with DESeq2. Genome Biol [Internet]. 2014 Dec 5;15(12):550. Available  
979 from: <http://genomebiology.biomedcentral.com/articles/10.1186/s13059-014-0550-8>
- 980 67. Thomas PD. PANTHER: A Library of Protein Families and Subfamilies Indexed by  
981 Function. Genome Res [Internet]. 2003 Sep 1;13(9):2129–41. Available from:  
982 <http://www.genome.org/cgi/doi/10.1101/gr.772403>  
983



## 984 **Figure Captions**

### 985 **Fig 1. Genome wide distribution of histone modifications in relation to annotations for the *M. incognita*** 986 **genome.**

987 The distribution of histone modifications was analyzed with ChromstaR, which calculated the spatial enrichment in  
988 histone modifications for different available genomic annotations. Enrichment is represented as the  
989  $\log(\text{observed/expected})$  value and ranges from 2 (highly enriched, red) to -2 (depletion, blue). This enrichment  
990 heatmap is a 5x10 matrix representing 5 histone modifications (H3K4me3, H3K9me3, H3K27ac, H3K27me3 and  
991 H4K20me1) and 10 genomic annotated elements (CDS, exon, five prime UTR, gene, mRNA, ncRNA, rRNA, TE,  
992 three prime UTR and tRNA). Three biological replicates of *M. incognita* eggs have been treated jointly to identify  
993 common histone modification enrichment.

994

### 995 **Fig 2. H3K4me3, H3K9me3, H3K27ac, H27me3 and H4K20me1 histone modifications on the *M. incognita*** 996 **genome.**

997 The general tracks of histone modifications are illustrated on the longest scaffold (Minc3s00001) of the *M. incognita*  
998 genome. Sequence reads for H3K4me3 (blue), H3K9me3 (red), H3K27ac (pink), H3K27me3 (green) and  
999 H4K20me1 (black) samples were visualized in IGV software. Values shown on the y axis represent the relative  
1000 enrichment of ChIP-Seq signals obtained with PeakRanger (peaks correspond to read counts after  
1001 background/input subtraction). The tracks were overlaid with the *M. incognita*'s annotations (dark blue) of Genes  
1002 and Transposable Elements (TE), as well as RNA-seq reads (grey). Each track contains information from one  
1003 biological replicate of eggs.

### 1004 **Fig 3. Distribution of histone modifications in relation to transposable element (TE) orders.**

1005 The distribution of histone modifications was analyzed with ChromstaR, which calculated the spatial enrichment in  
1006 histone modifications for annotated subfamilies of TE in *M. incognita*. Enrichment is represented as the  
1007  $\log(\text{observed/expected})$  value and ranges from 2 (highly enriched, red) to -2 (depletion, blue). This enrichment  
1008 heatmap is a 5x11 matrix representing 5 histone modifications (H3K4me3, H3K9me3, H3K27ac, H3K27me3 and  
1009 H4K20me1) and 11 TE orders (4 DNA-transposons (Helitron, Maverick, TIR, MITE), and 5 RNA transposons (LINE,  
1010 LTR, SINE, LARD and TRIM)). Three biological replicates of *M. incognita* eggs have been treated jointly to identify  
1011 common histone modification enrichment.

1012

### 1013 **Fig 4. RNA-seq regulation of the protein-coding genes associated with histone modifications.**

1014 Analysis of transcript levels of the genes associated with H3K27ac (blue), H3K27me3 (yellow), H3K4me3 (sky blue),  
1015 H3K9me3 (dark pink) and H4K20me1 (green) in (A) Eggs and (B) J2s. Genes were considered to be associated  
1016 with a histone modification if at least 1 bp of the annotation overlapped with an identified histone modification. Three  
1017 biological replicates of *M. incognita* eggs and J2s have been treated jointly to identify common histone modification  
1018 enrichment using ChromstaR. Normalized expression ( $\text{Log}(\text{median FPKM}+1)$ ) of genes, calculated triplicates is  
1019 shown. A Kruskal-Wallis test was performed, followed by a pairwise Dunn test, to assess the significance of  
1020 differences in gene expression level between the 5 histone modifications. ns  $p > 0.05$ , \*  $p \leq 0.05$ , \*\*  $p \leq 0.01$ , \*\*\*

1021  $p \leq 0.001$ , \*\*\*\*  $p \leq 0.0001$ .

1022

1023

1024 **Fig 5. Average H3K4me3 enrichment profiles correlate with TSS regions of 10% most expressed genes.**

1025 Average enrichment profiles of 5 histone modifications along a 4 kb region framing expressed protein-coding genes  
1026 after ChIP-Seq of (A and B) eggs and (B and D) J2s. Average enrichment profiles were generated by ChromstaR,  
1027 (log(observed/expected) value ranging from 1 (highly enriched) to -2 (depletion)), for 5 histone modifications:  
1028 H3K27ac (blue), H3K27me3 (yellow), H3K4me3 (sky blue), H3K9me3 (dark pink) and H4K20me1 (green). Three  
1029 biological replicates of *M. incognita* eggs and J2s have been treated jointly to identify common histone modification  
1030 enrichment. Enrichment was analyzed for the (A and C) top and (B and D) bottom 10% of associated protein-coding  
1031 genes ranked on the basis of RNA-seq normalized expression data (Log(median FPKM+1)). *x-axis*: % in gene bodies  
1032 and distance in bp upstream of TSS or downstream of TES. *y-axis*: Density of mapped reads  
1033 (log(observed/expected)).  
1034

1035 **Fig 6. Functional annotation of protein-coding genes associated with H3K4me3.**

1036 Histogram showing the 'Biological processes'/Gene ontology (GO) term enrichment of protein-coding genes  
1037 associated with H3K4me3. Protein-coding genes were considered to be associated with H3K4me3 if at least 1 bp  
1038 of the protein-coding gene annotation overlapped with this histone modification. Three biological replicates of *M.*  
1039 *incognita* eggs and J2s have been treated jointly to identify common histone modification enrichment.  
1040 Overrepresented GO terms, in eggs (blue; 6,014 genes) and J2s (orange, 10,564 genes), were identified with  
1041 GoFuncR with a FWER < 0.05 cutoff. X-axis is the -log<sub>10</sub>(pvalue) calculated to represent GO term enrichment on  
1042 the bar chart.

1043 **Fig 7. Stage-specific enrichment in Gene Ontology (GO) terms for protein-coding genes associated with  
1044 H3K4me3.**

1045 Histogram showing the "Biological processes"/GO term enrichment of protein-coding genes showing both (i)  
1046 differential gene expression during eggs-to-J2s transition; and (ii) H3K4me3 association. Differential gene  
1047 expression was calculated using DESeq2 on triplicates, with a p value < 0.05 as a threshold for overexpression.  
1048 Protein-coding genes were considered to be associated with H3K4me3 if at least 1 bp of the protein-coding gene  
1049 annotation overlapped with this histone modification. Three biological replicates of *M. incognita* eggs and J2s have  
1050 been treated jointly to identify common histone modification enrichment. Overrepresented GO terms, in eggs (blue  
1051 ; 89 genes) and J2s (orange, 117 genes), were identified with GoFuncR. with a FWER < 0.05 cutoff. X-axis is the  
1052 -log<sub>10</sub>(pvalue) calculated to represent GO term enrichment on the bar chart.

1053

1054

1055 **Supporting information**

1056 **S1 Figure. Two-step antibody validation for ChIP-Seq.**

1057 Examples of two-step antibody validation adapted from (Cosseau et al., 2009): Western blot detection of (A)  
1058 acetylated H3 at lysine 27 (H3K27ac), (B) monomethylated H4 at lysine 20 (H4K20me1) and (C) trimethylated H3  
1059 at lysine 27 (H3K27me3). qPCR validation on immunoprecipitated chromatin from *M. incognita*, with various  
1060 volumes (0-16 µL) of (D) anti-H3K27 acetyl and (E) anti-H4K20 monomethyl antibodies. The percent input recovery  
1061 (%IR) was calculated from the targeted amount of DNA and normalized with respect to the percent input recovery  
1062 for the housekeeping gene. (A) and (D) show examples of successful validation for both western blotting and ChIP-  
1063 titration, whereas (B) and (E) were validated only on western blotting, and (C) was not validated at the first step.

1064

1065 **S2 Figure. H3K4me3, H3K9me3, H3K27ac, H27me3 and H4K20me1 histone modifications on the *M.***  
1066 ***incognita* genome.**

1067 Triplicate tracks of histone modifications are illustrated on *M. incognita* at high resolution. Sequence reads for (A)  
1068 H3K4me3 (blue, scaffold Minc3s00004), (B) H3K9me3 (red, scaffold Minc3s00013), (C) H3K27ac (pink, scaffold  
1069 Minc3s00038), (D) H3K27me3 (green, scaffold Minc3s00003) and (E) H4K20me1 (black, scaffold Minc3s00007)  
1070 samples were visualized in IGV software. Values shown on the y axis represent the relative enrichment of ChIP-  
1071 Seq signals obtained with PeakRanger (peaks correspond to read counts after background/input subtraction). For  
1072 each histone modification, the three biological replicates (rep1, rep2 and rep3) are shown. Each track contains  
1073 information from one biological replicate of eggs.

1074

1075 **S3 Figure. Genome wide distribution of histone modifications, J2 samples, in relation to annotations for**  
1076 **the *M. incognita* genome.**

1077 The distribution of histone modifications was analyzed with ChromstaR, which calculated the spatial enrichment in  
1078 histone modifications for different available genomic annotations. Enrichment is represented as the  
1079 log(observed/expected) value and ranges from 2 (highly enriched, red) to -2 (poorly enriched, blue). This enrichment  
1080 heatmap is a 5x10 matrix representing 5 histone modifications (H3K4me3, H3K9me3, H3K27ac, H3K27me3 and  
1081 H4K20me1) and 10 genomic annotated elements (CDS, exon, five prime UTR, gene, mRNA, ncRNA, rRNA, TE,  
1082 three prime UTR and tRNA). Three biological replicates of *M. incognita* J2s have been treated jointly to identify  
1083 common histone modification enrichment.

1084

1085 **S4 Figure. Distinct epigenetic landscapes at the transposable element (TE) and protein coding-gene**  
1086 **annotations in *M. incognita*.**

1087 (A) Illustration of H3K9me3 enrichment in association with TE. Screenshot of the full scaffold Minc3s00875  
1088 with selected tracks for H3K9me3 (red), TE and gene annotations (dark blue).

1089 (B) Illustration of H3K4me3 enrichment in association with expressed protein-coding genes. Screenshot of the  
1090 full scaffold Minc3s03894 with selected tracks for H3K4me3 (sky-blue), gene annotations (dark blue) and  
1091 eggs transcripts (RNA-seq; grey).

1092 Samples were visualized in IGV software. Values shown on the y axis represent the relative enrichment of ChIP-  
1093 Seq signals obtained with PeakRanger (peaks corresponding to read counts, normalized by the percent input  
1094 method). Each track contains information from one biological replicate of eggs.

1095

1096 **S1 Table. Antibodies selected and tested for ChIP-seq analysis on *M. incognita*.**

1097 Antibodies were selected based on their availability, their validation in *C. elegans* and their validation as ChIP-grade  
1098 when possible. Each antibody was tested by a two-step validation process, as described by Cosseau et al., 2009.

1099 The amount of antibody used was determined by titration at the saturation point.

1100

1101 **S2 Table. *M. incognita* Egg-overexpressed genes orthologs in *C. elegans*.**

1102 GO enrichment analysis showed specific terms associated with orthologous egg-overexpressed genes. Protein  
1103 family/subfamily and classes were obtained using PANTHER and detailed for each *M. incognita* and *C. elegans*  
1104 gene, with their GO ID.

1105

1106 **S3 Table. *M. incognita* J2-overexpressed genes orthologs in *C. elegans*.**

1107 GO enrichment analysis showed specific terms associated with orthologous J2-overexpressed genes. Protein  
1108 family/subfamily and classes were obtained using PANTHER and detailed for each *M. incognita* and *C. elegans*  
1109 gene, with their GO ID.

1110

1111 **S4 Table Transcriptional regulation of known subventral glands (SvG) effector genes.**

1112 According to the literature [31], 48 non-redundant *M. incognita* effectors have been identified in SvG (i.e., columns:  
1113 effector-gene number, gene name and accession number on *M. incognita* genome). For this study, SvG effector  
1114 genes were classified according to both their expression level and flanking histone modifications during eggs-to-  
1115 J2s transition. Differential gene expression is shown as RNA-seq fold expression changes, Log<sub>2</sub>(Fold Change),  
1116 calculated using DESeq2 on triplicates, with a p value < 0.05 as a threshold for overexpression. Effector genes  
1117 were considered to be associated with a histone modification if at least 1 bp of the annotation overlapped with an  
1118 identified histone modification. Three biological replicates of *M. incognita* eggs and J2s have been treated jointly to  
1119 identify common histone modification enrichment using ChromstaR. [] indicates no histone modification has been  
1120 identified. NS indicates no difference in gene expression between egg and J2 samples. NA indicates no predicted  
1121 genes on *M. incognita* genome.

1122

1123 **S5 Table. Transcriptional regulation of known dorsal gland (DG) effector genes.**

1124 According to the literature [31], 34 non-redundant *M. incognita* effectors have been identified in DG (i.e. columns:  
1125 effector-gene number, gene name and accession number on *M. incognita* genome). For this study, DG effector  
1126 genes were classified according to both their expression level and flanking histone modifications during eggs-to-  
1127 J2s transition. Differential gene expression is shown as RNA-seq fold expression changes, Log<sub>2</sub>(Fold Change),  
1128 calculated using DESeq2 on triplicates, with a p value < 0.05 as a threshold for overexpression. Effector genes  
1129 were considered to be associated with a histone modification if at least 1 bp of the annotation overlapped with an  
1130 identified histone modification. Three biological replicates of *M. incognita* eggs and J2s have been treated jointly to  
1131 identify common histone modification enrichment using ChromstaR. [] indicates no histone modification has been  
1132 identified. NS indicates no difference in gene expression between egg and J2 samples. NA indicates no predicted  
1133 genes on *M. incognita* genome.

1134

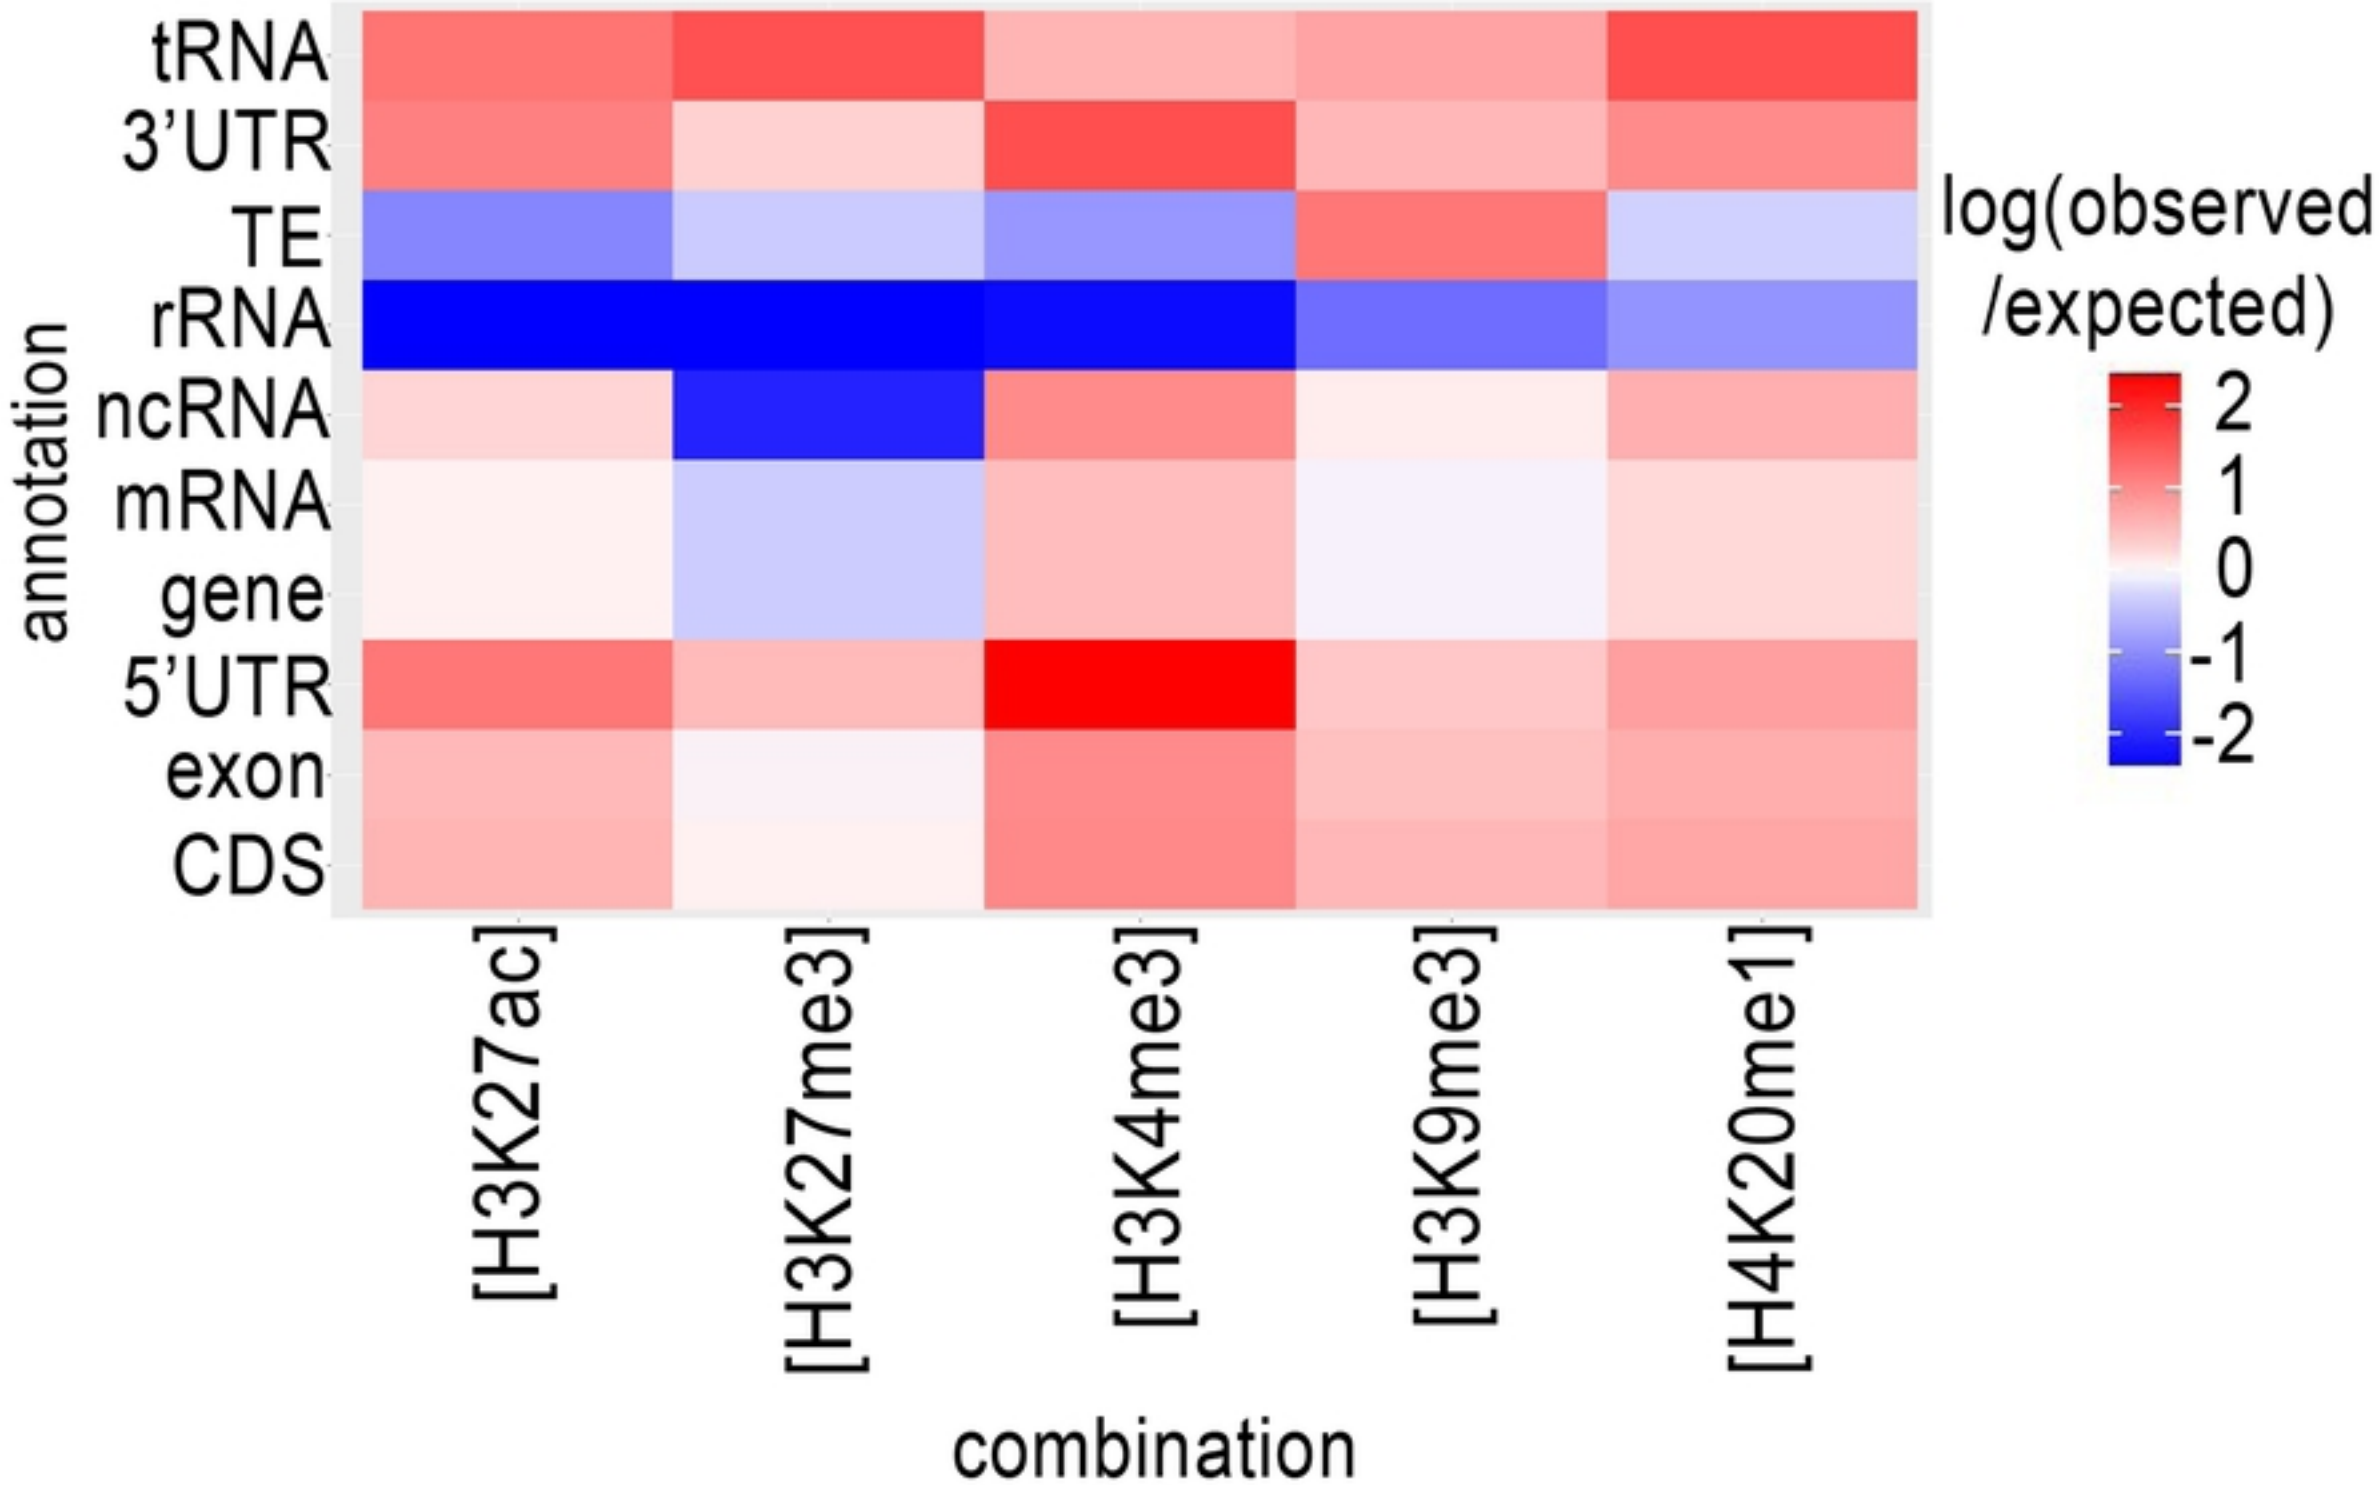

Figure 1

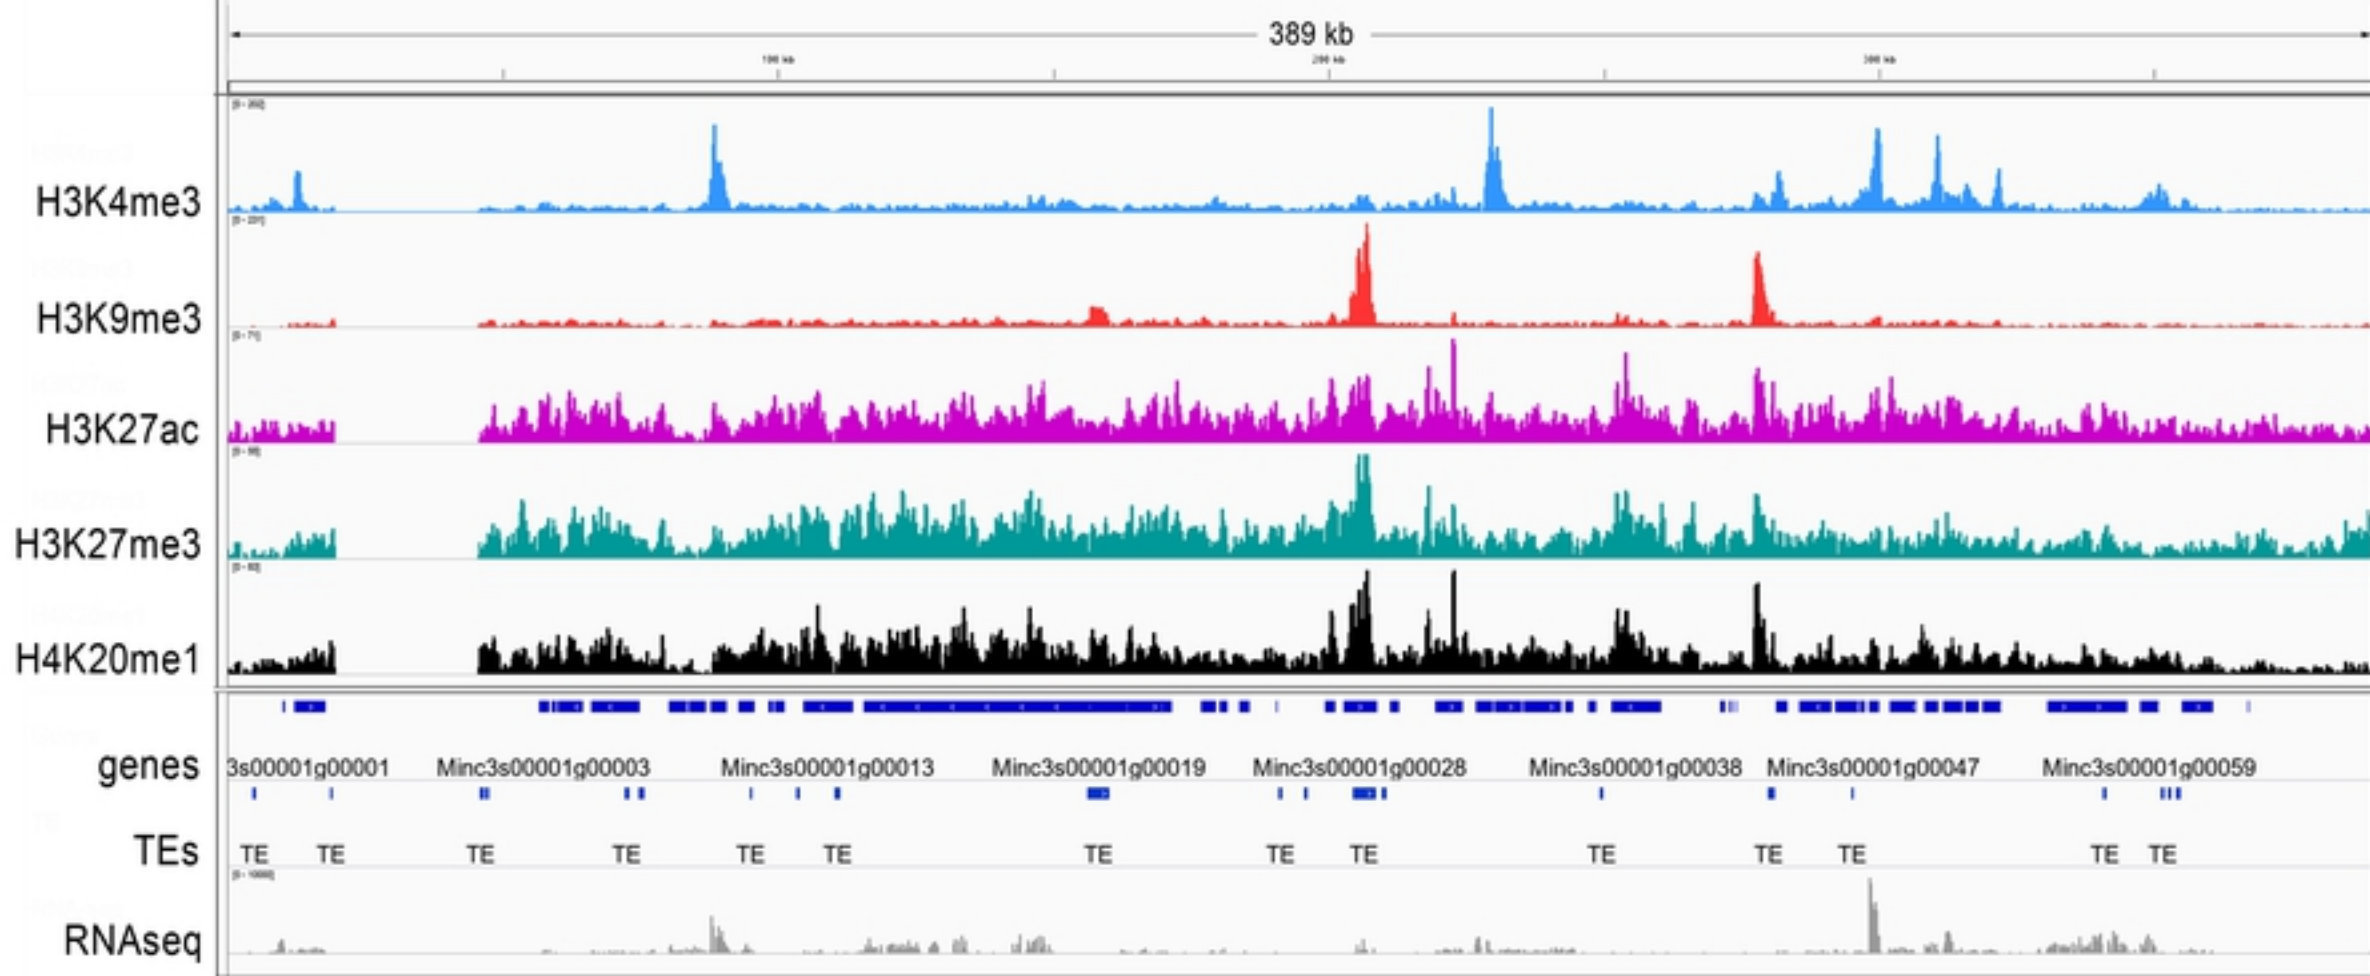

Figure 2

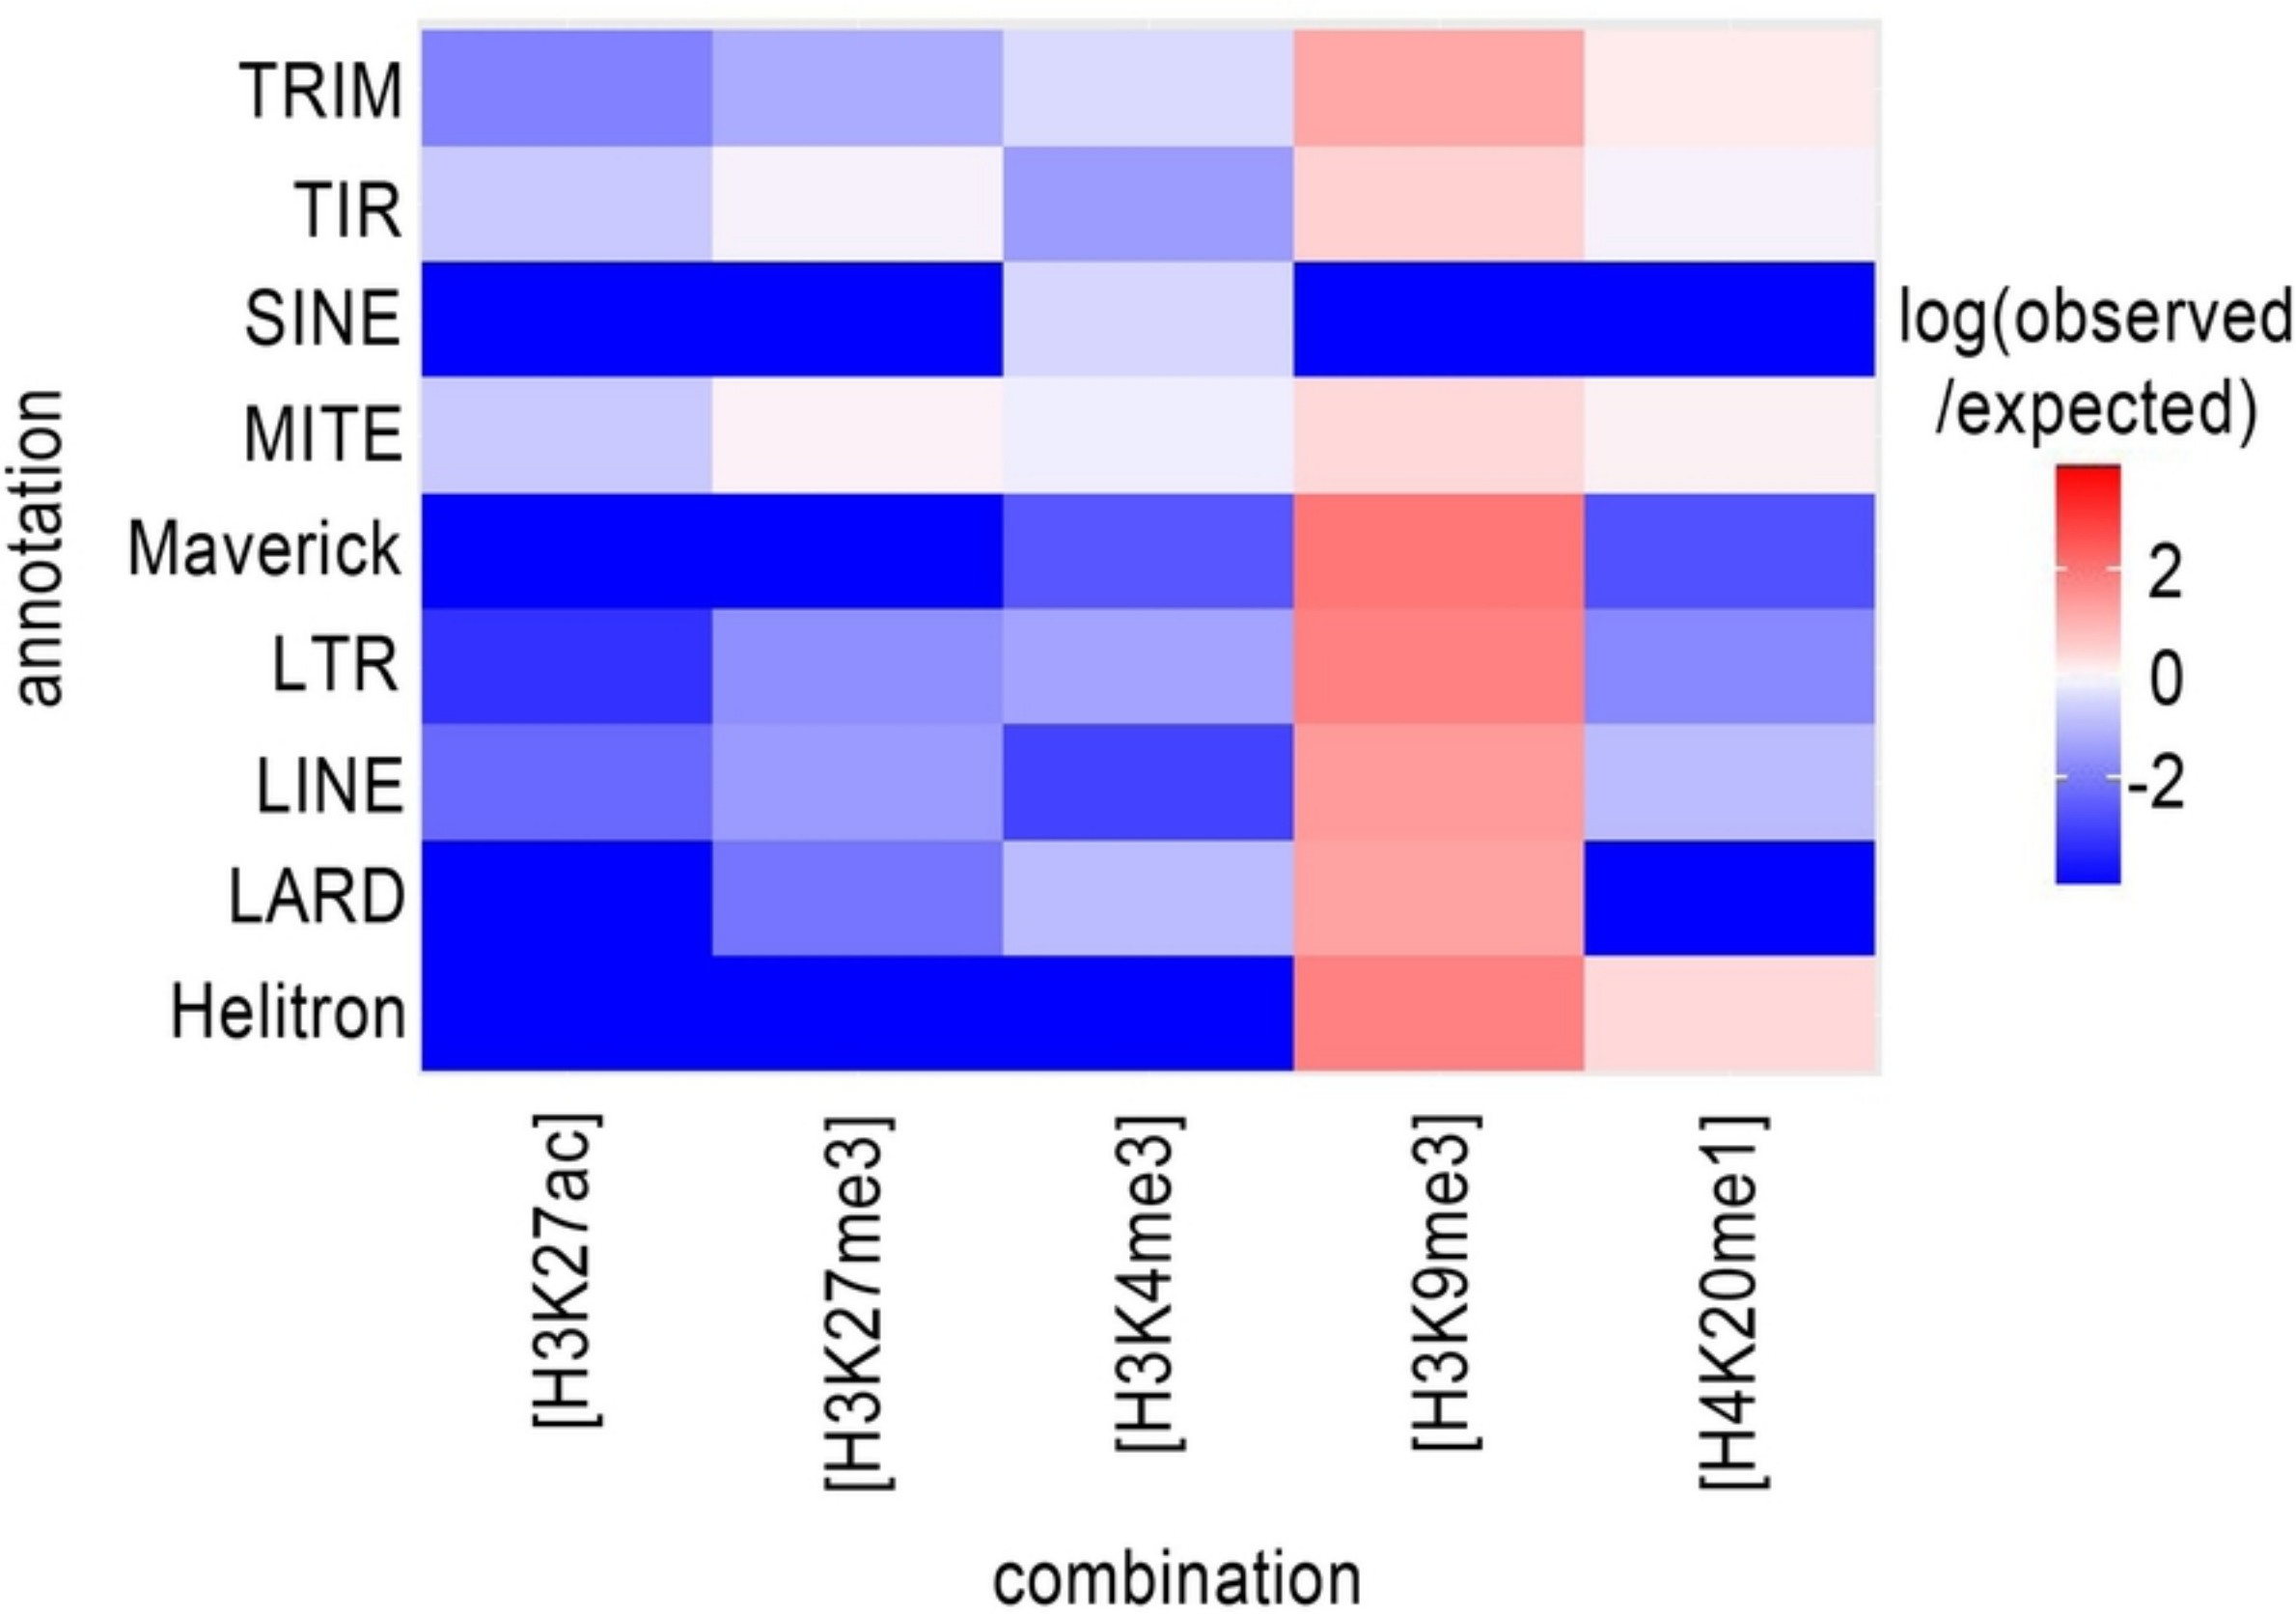

Figure 3

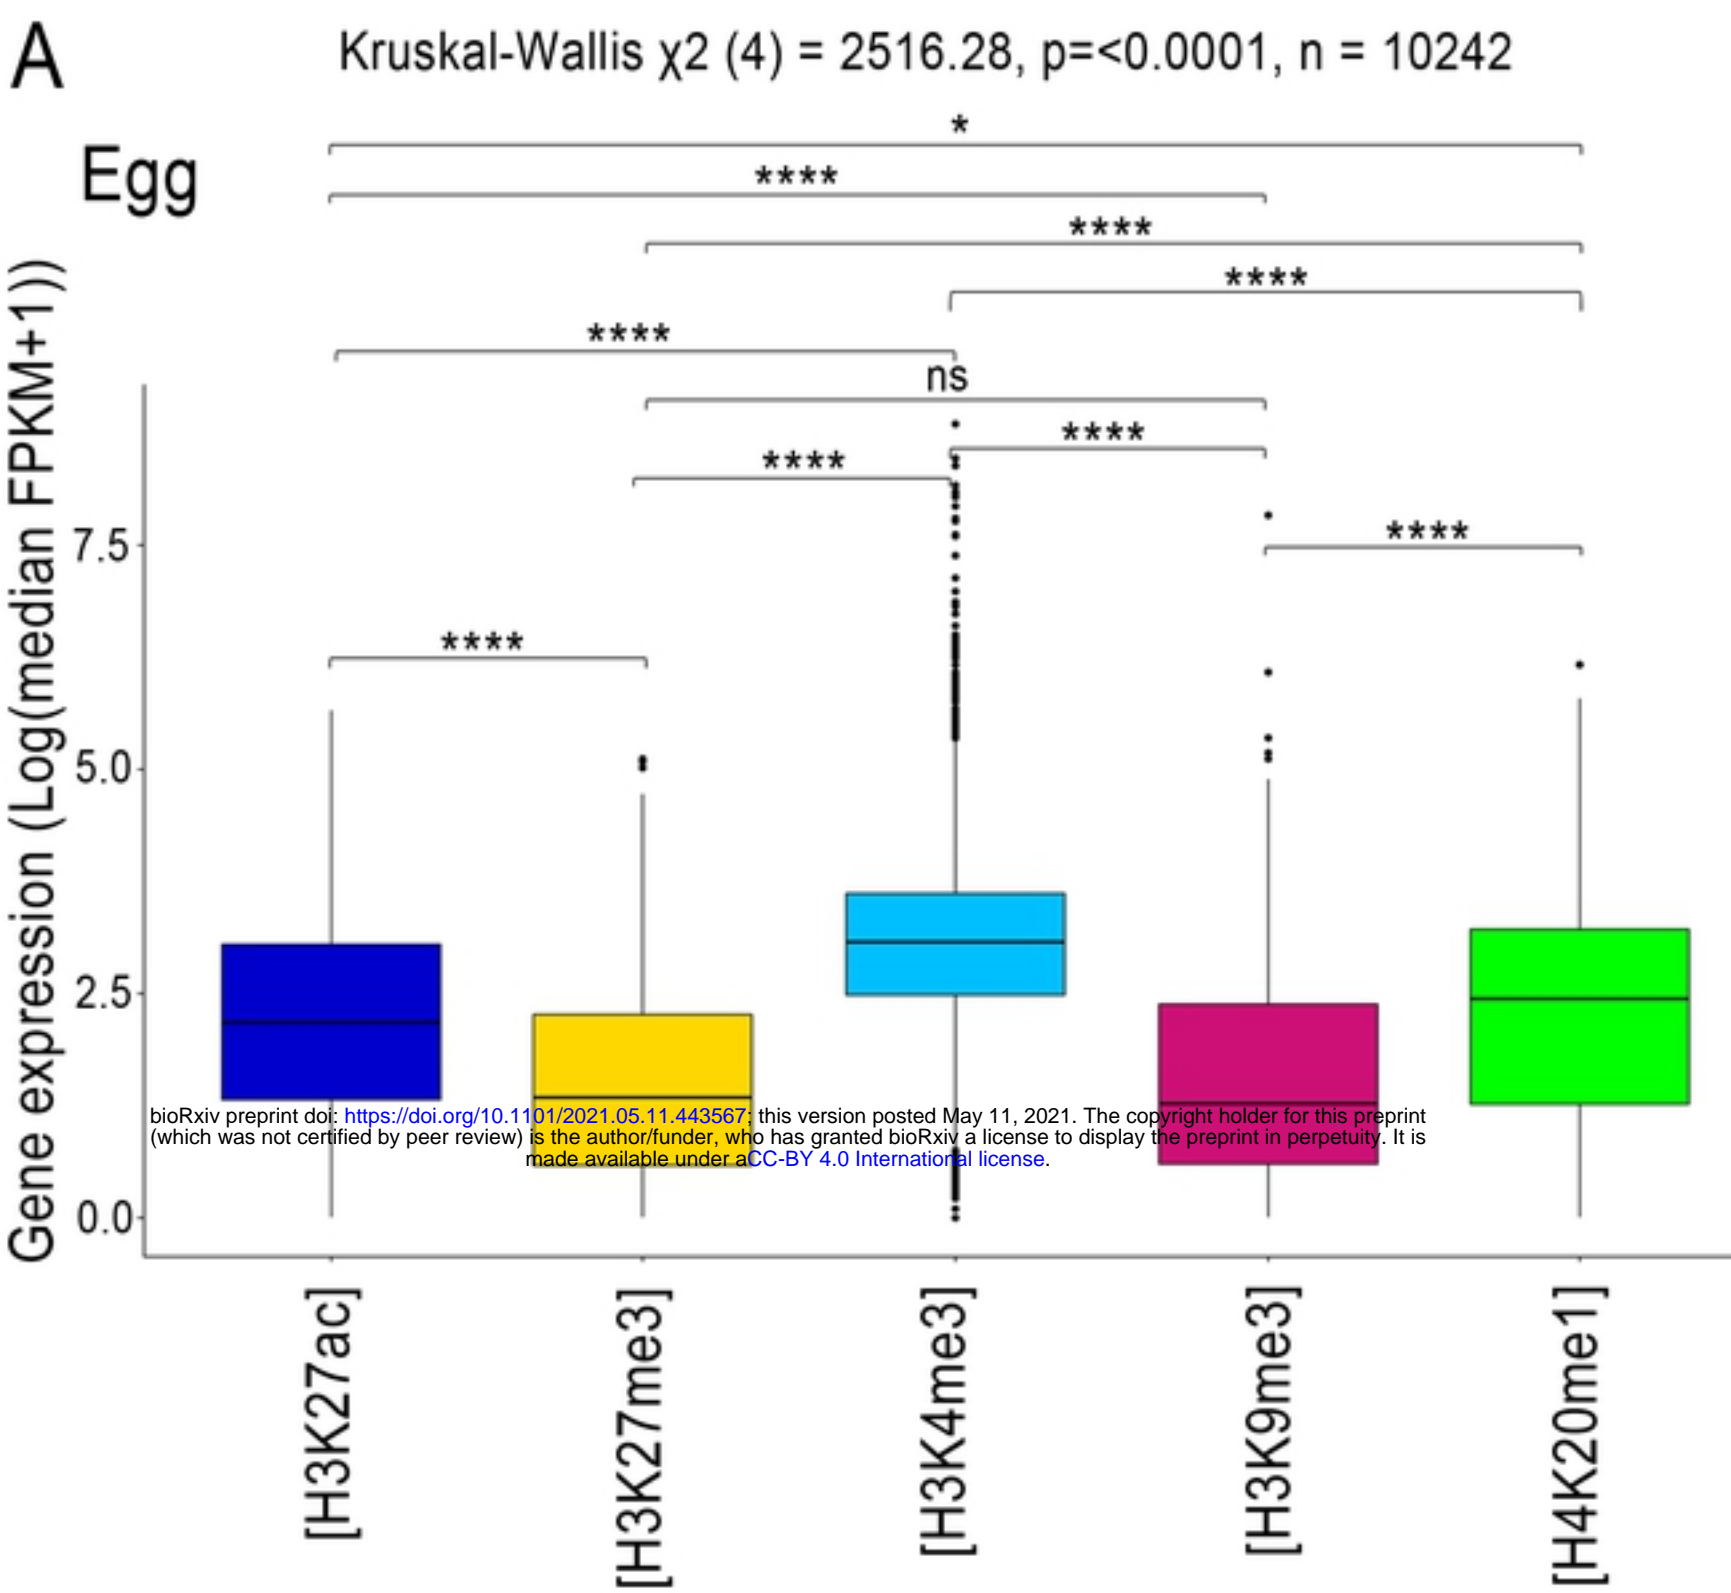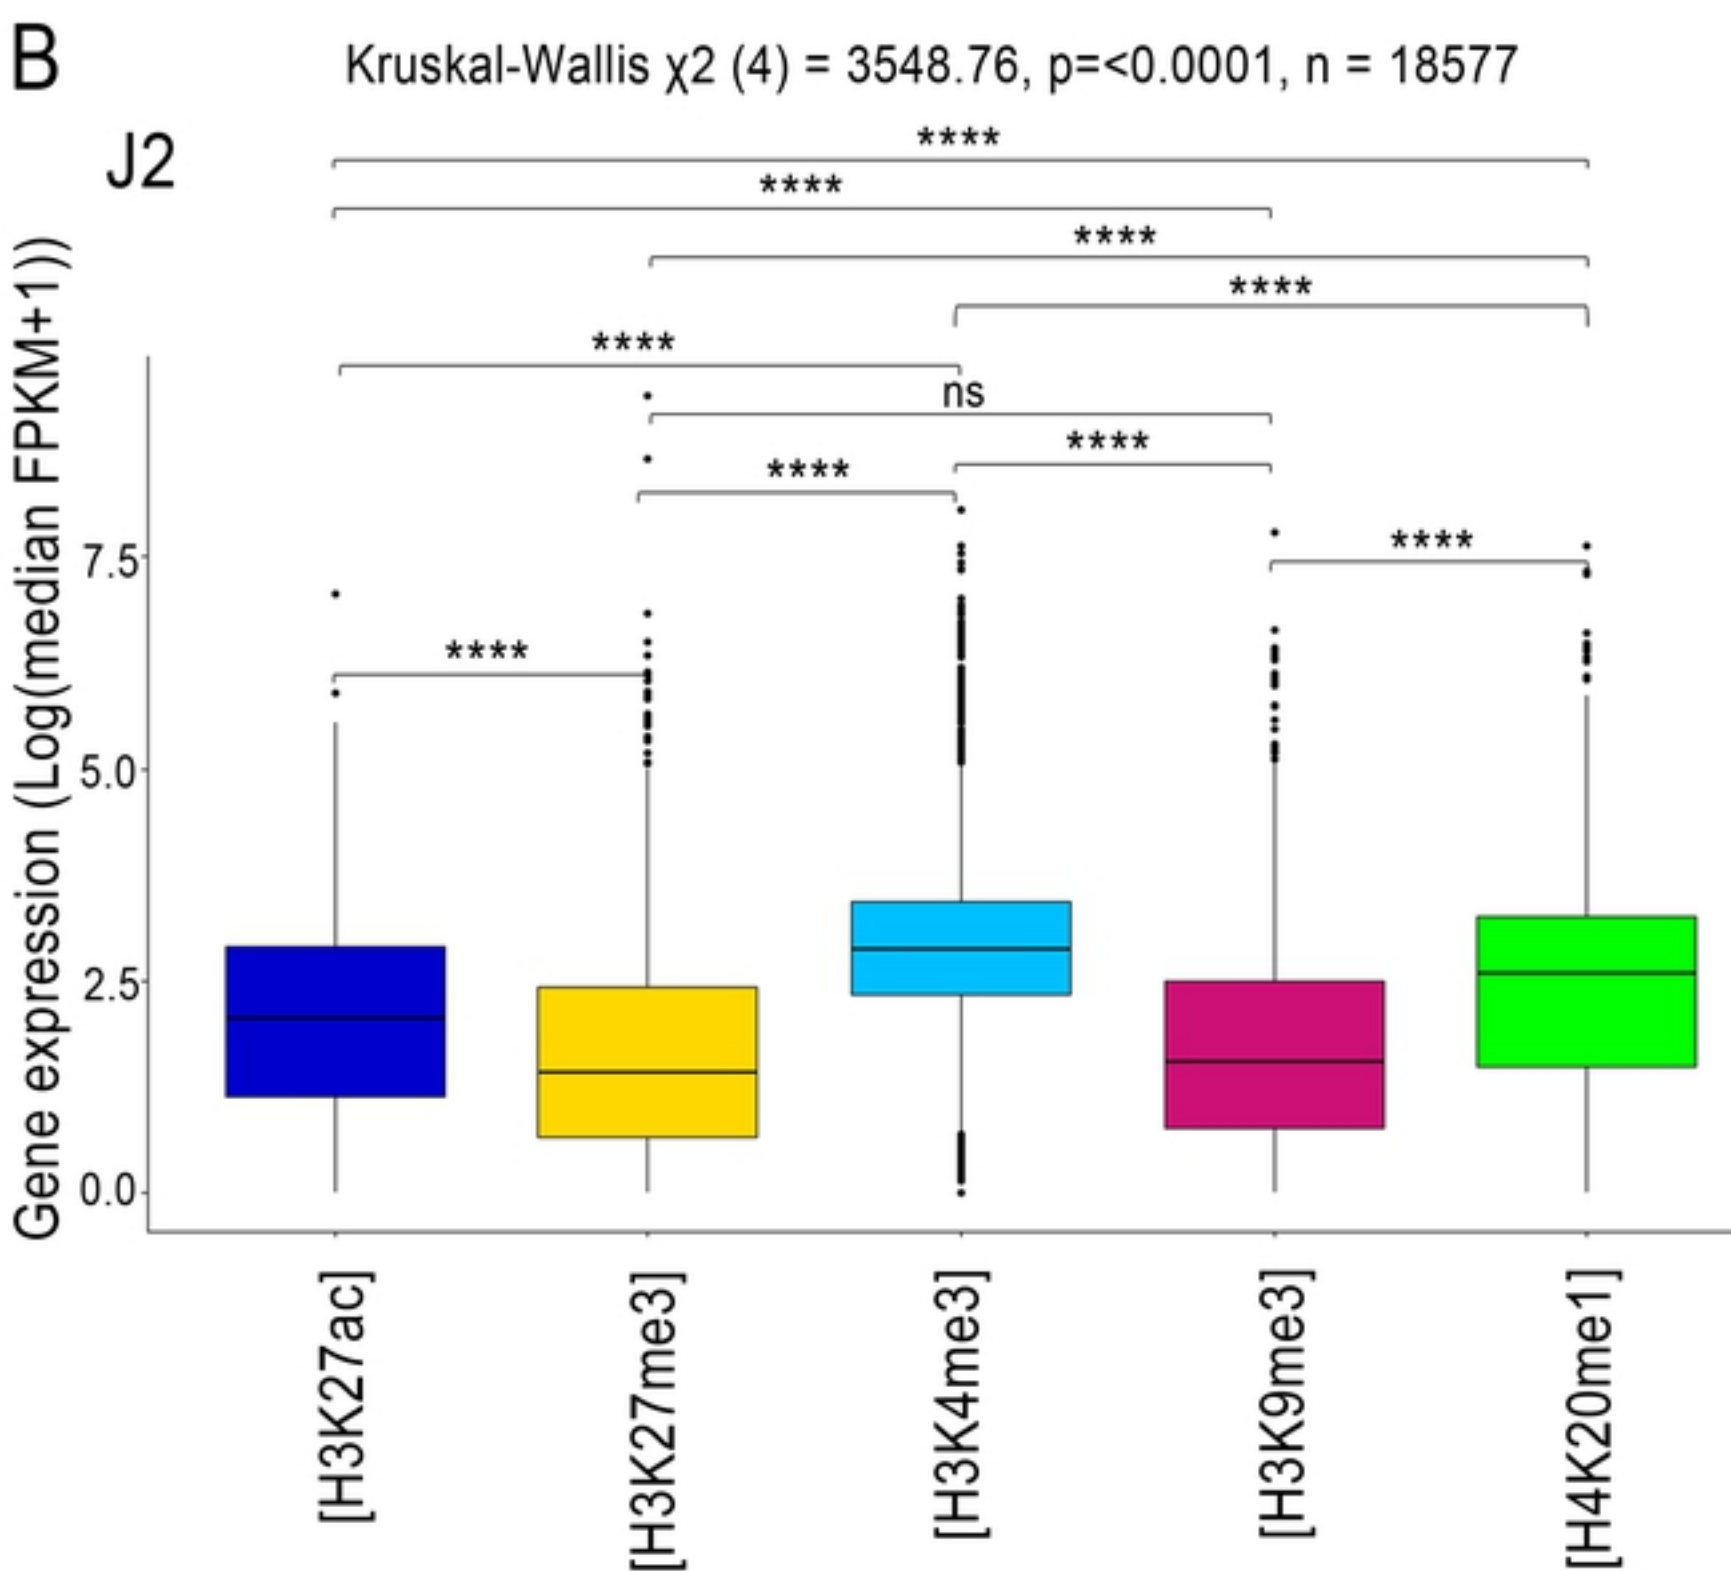

Figure 4



10% most expressed

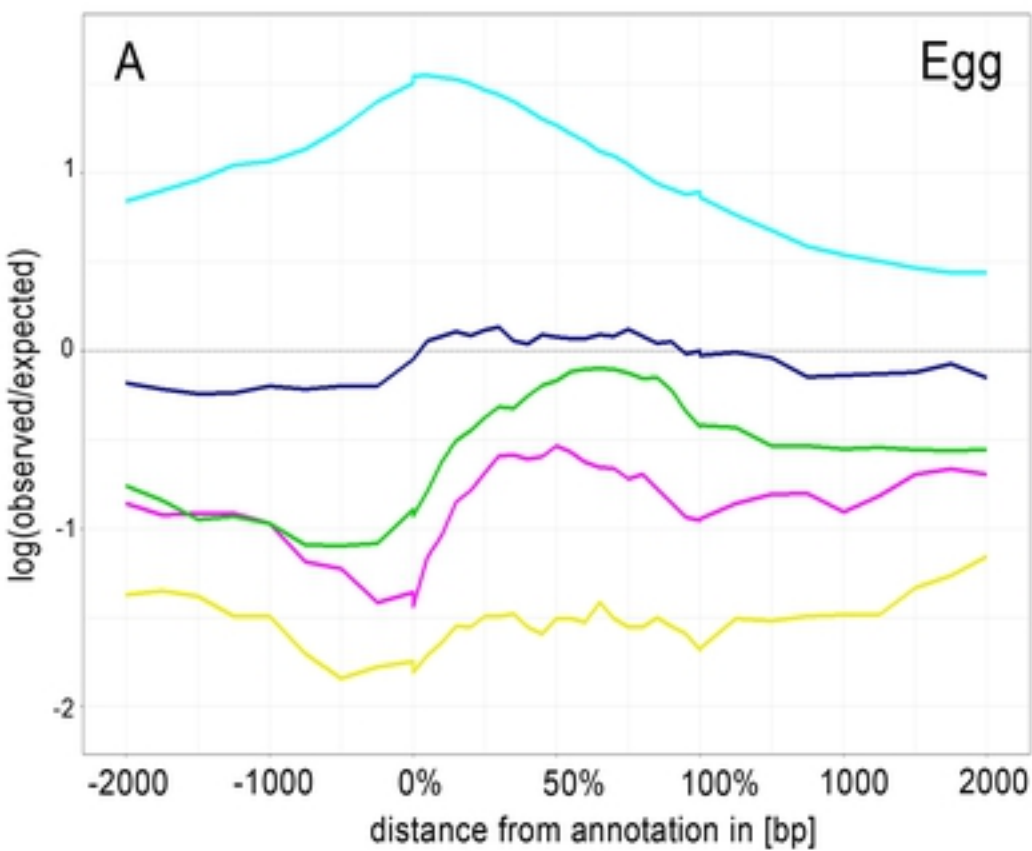

10% less expressed

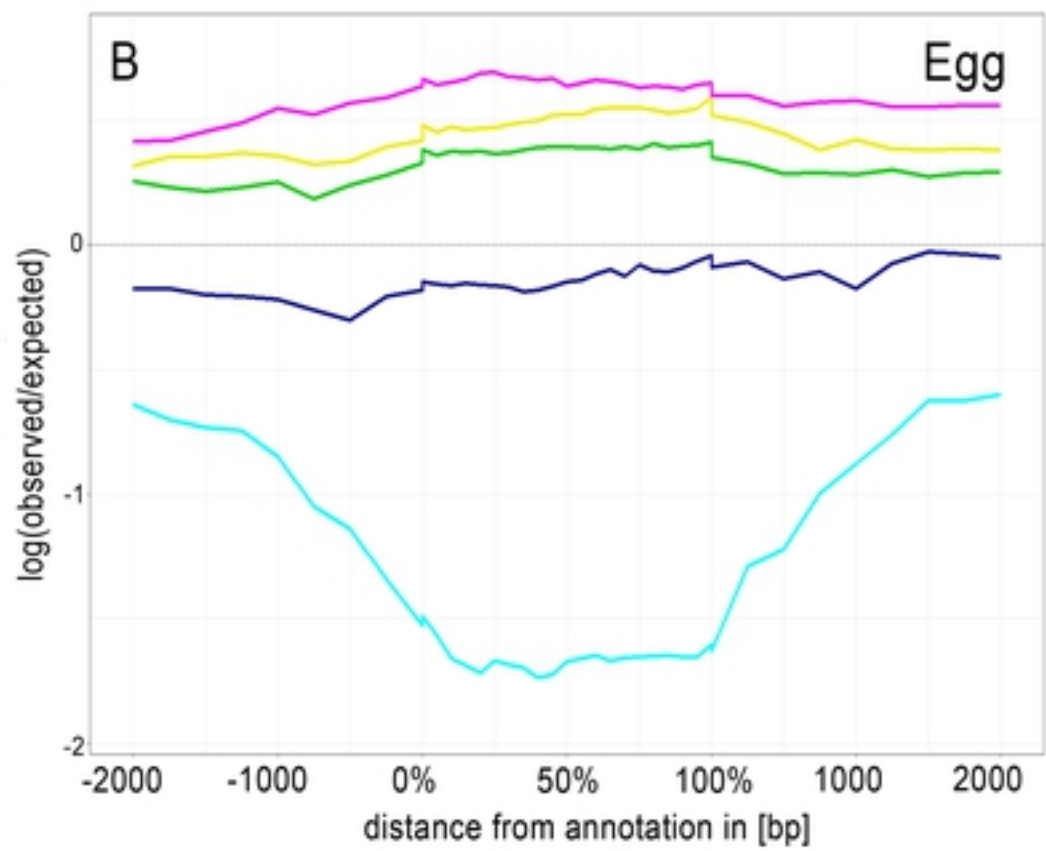

mark

- H3K27ac
- H3K27me3
- H3K4me3
- H3K9me3
- H4K20me1

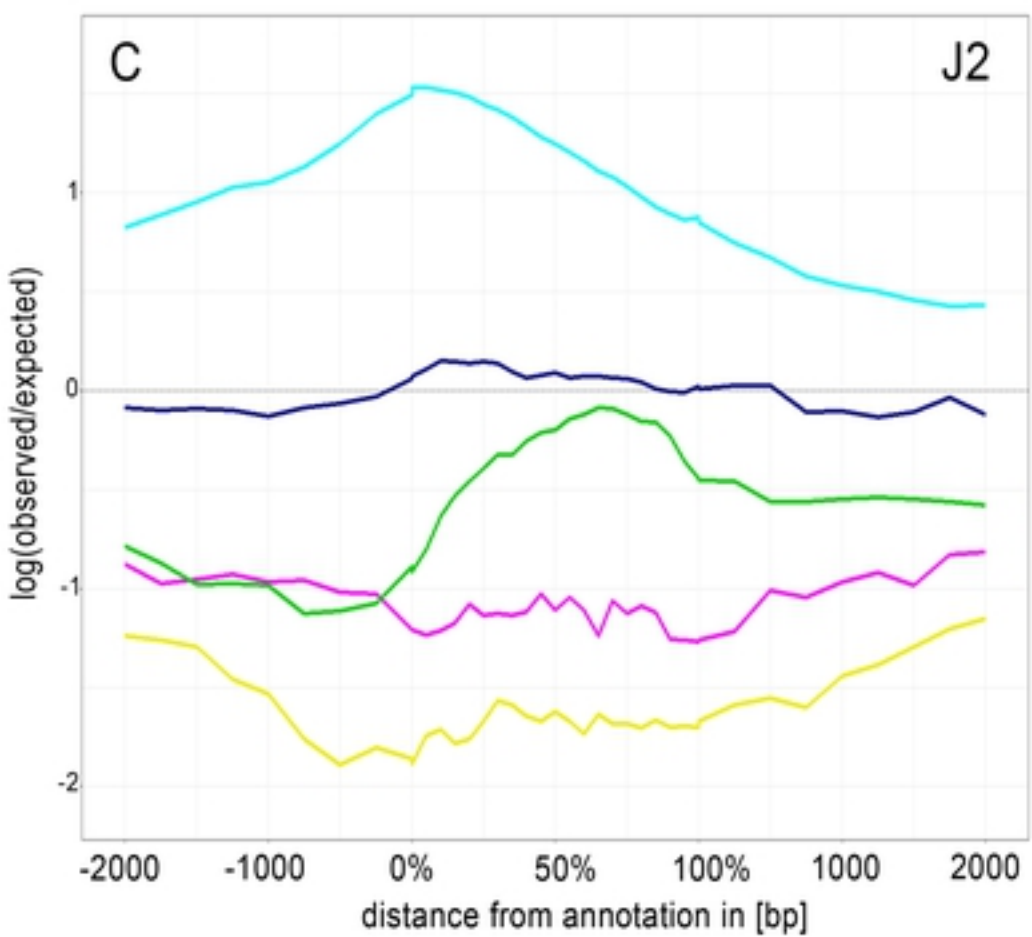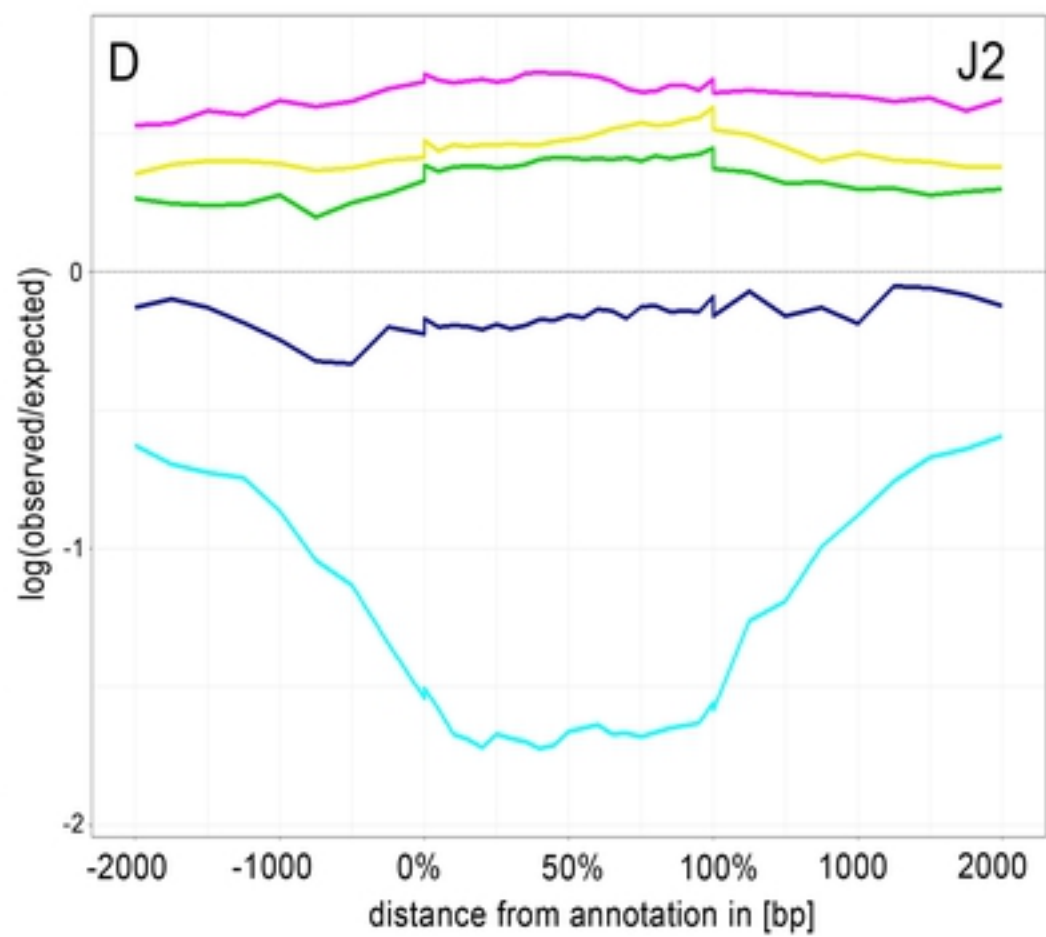

Figure 5

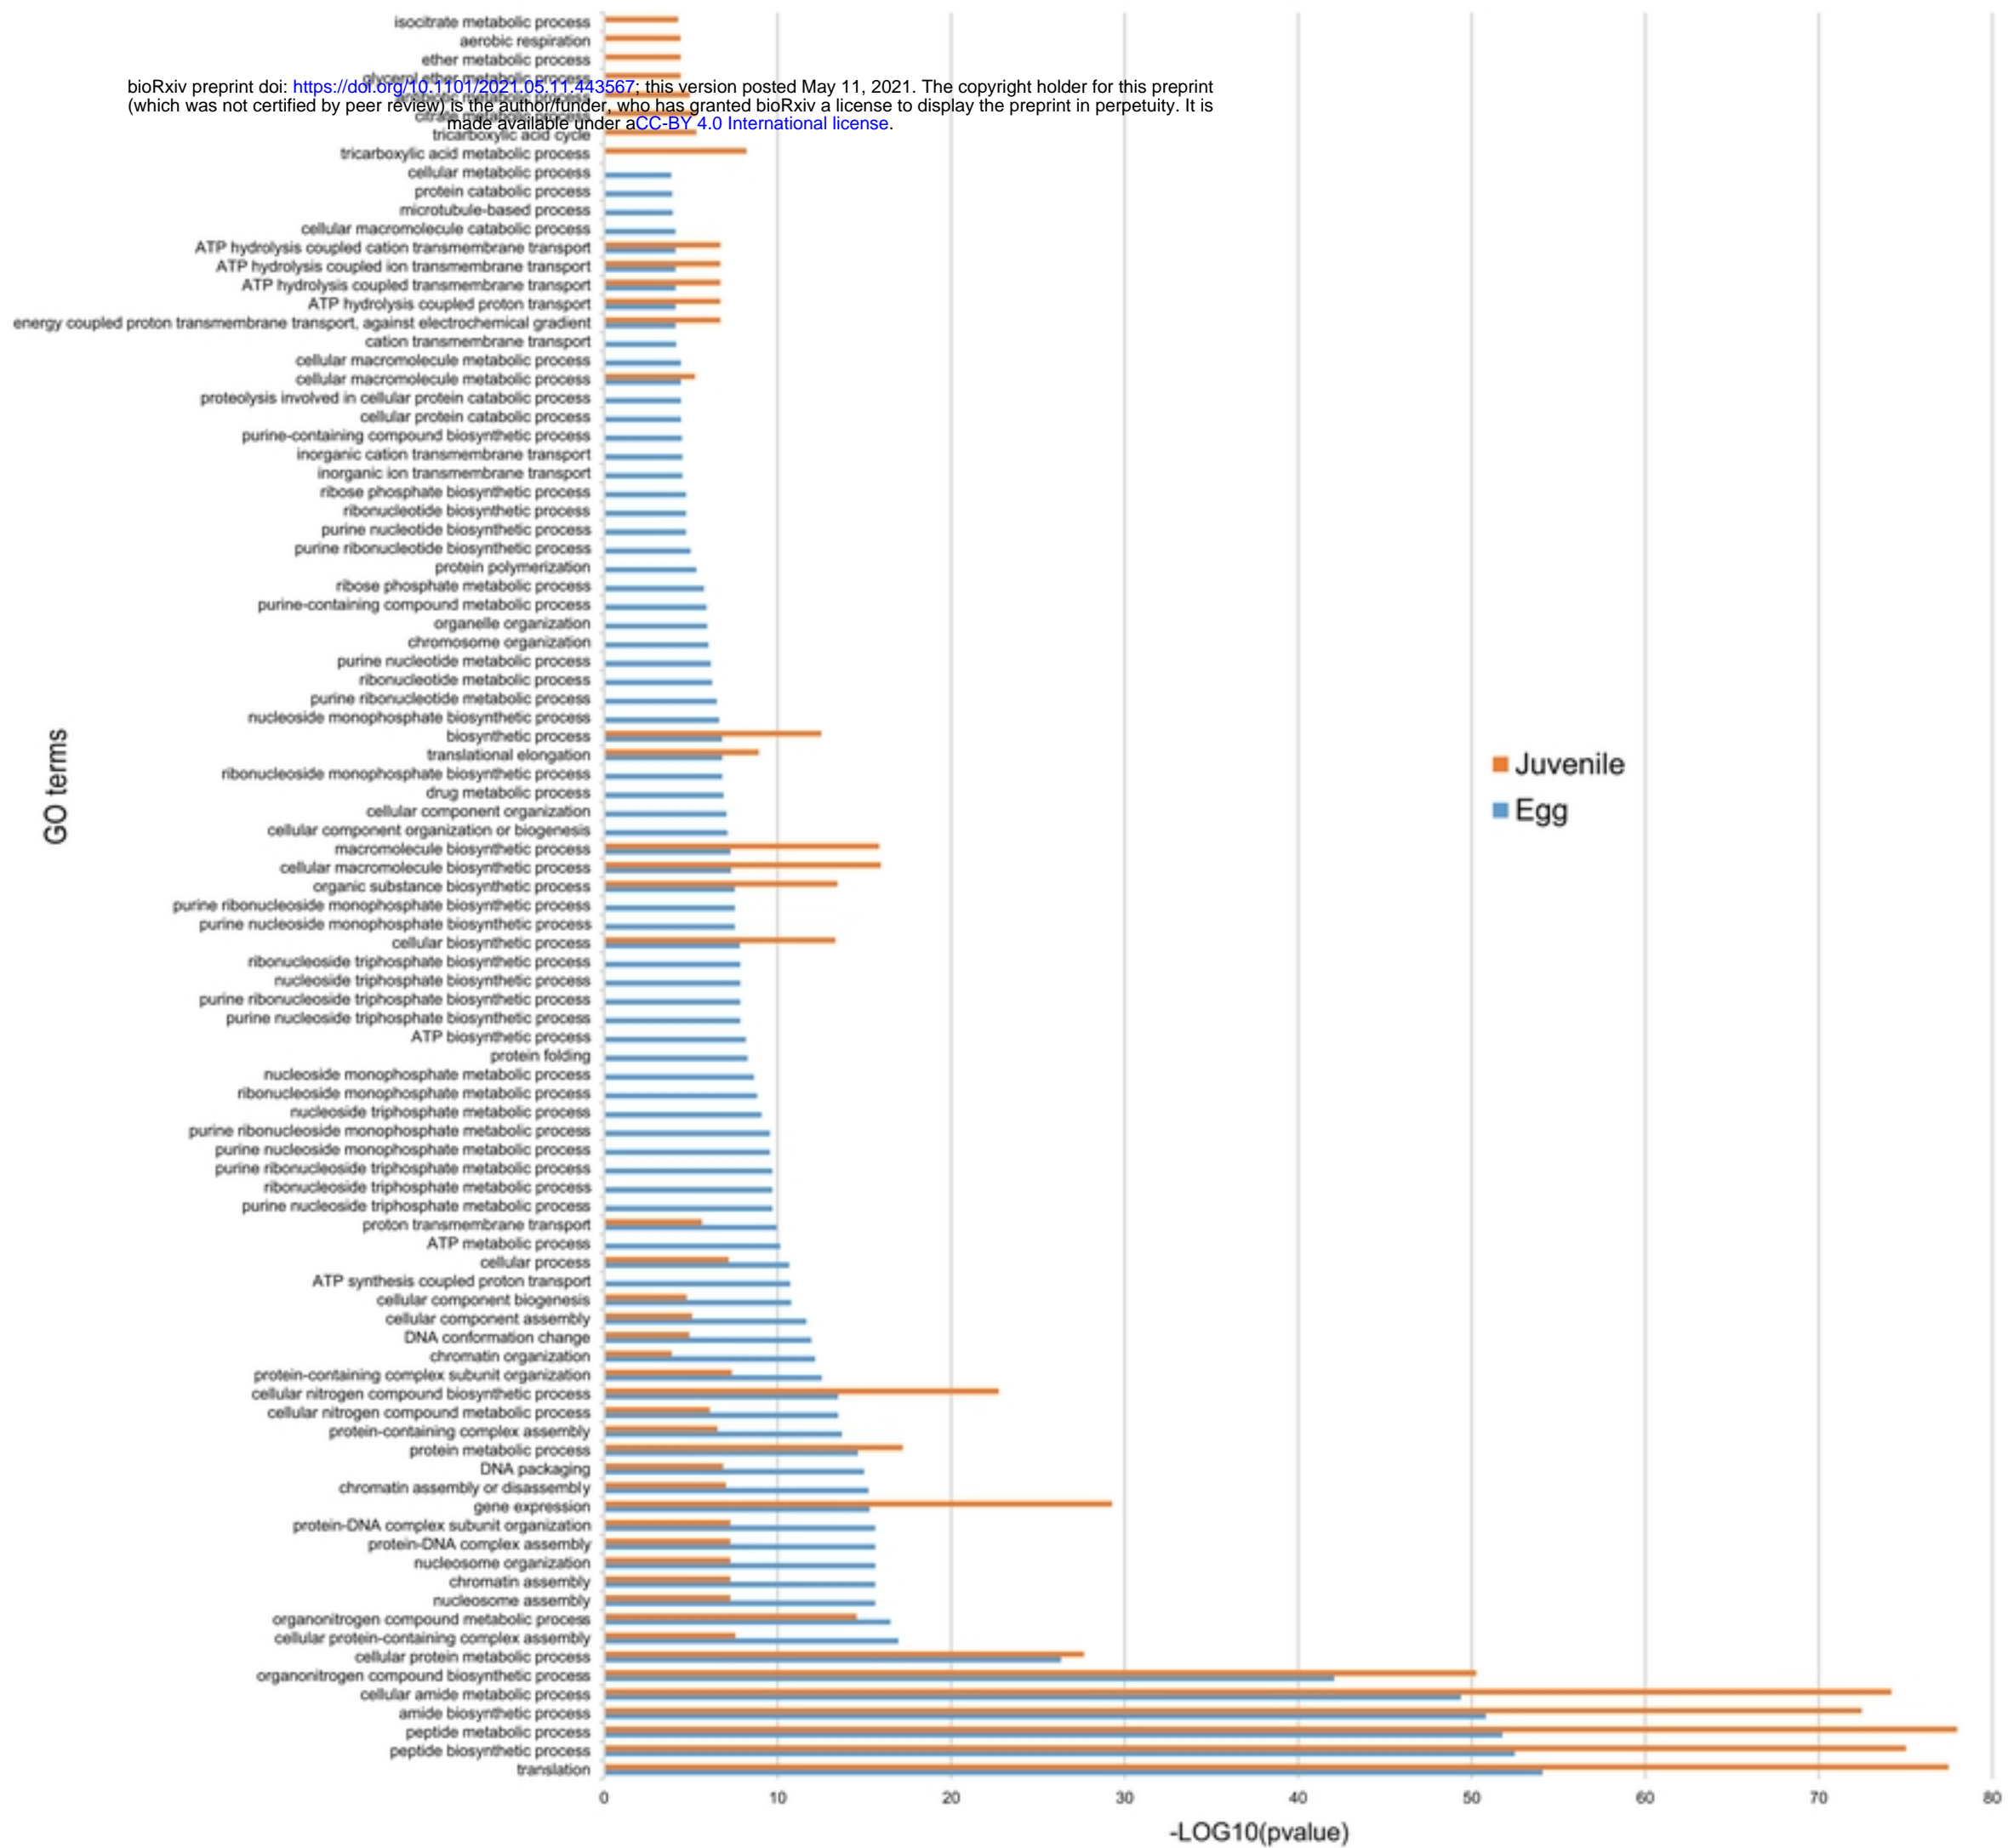

Figure 6

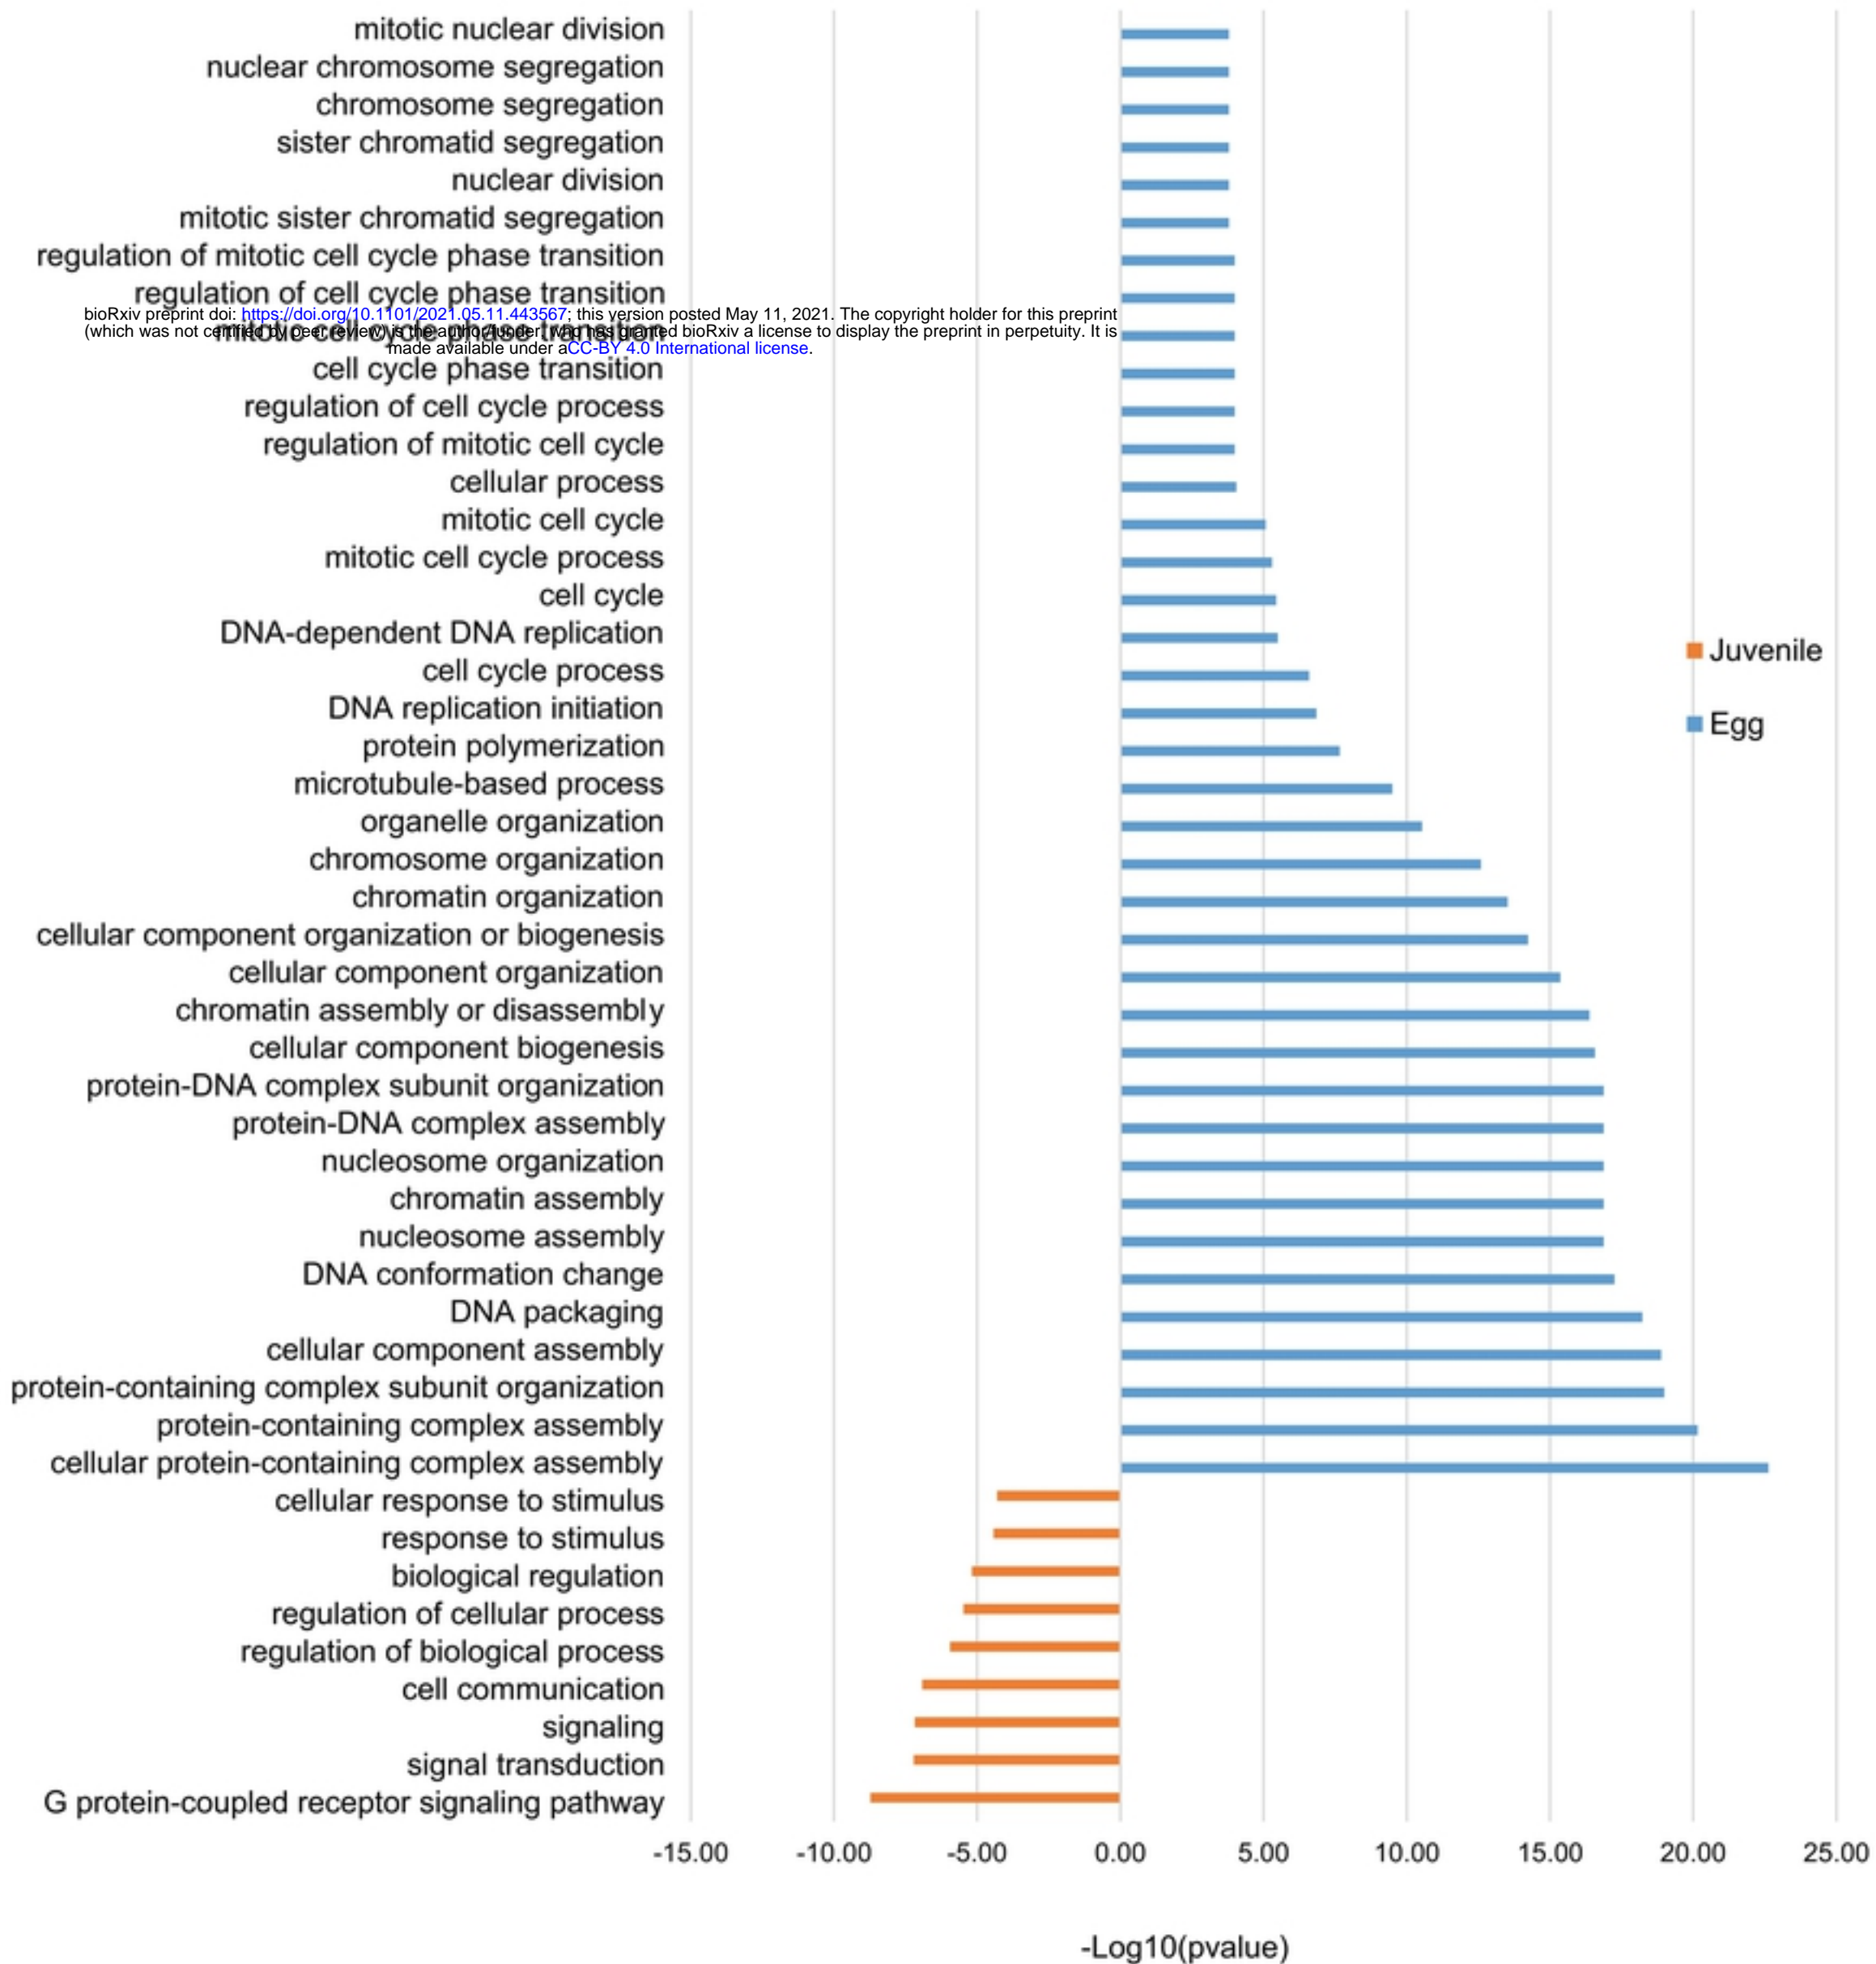

Figure 7
